# Supplementary material
Source: PubMed Central journal article supplement (PMC2953922)

## Supplemental Figures:

Annotated spectra for crosslinks No. 1-25. Numbers in upper left hand corner refer to the “No.” column on Table 1 and Table 2 in the main text. Dagger: † and double dagger: ‡ symbols indicate that the ion was observed as with one or two additional hydrogen atom transfers. Most product ions which contain the DEB bridge were found as a mixture of these species. Contaminant peaks that are within the precursor ion selection window are marked with an asterisk: \*.



2)

prec: 512.4891<sup>5+</sup>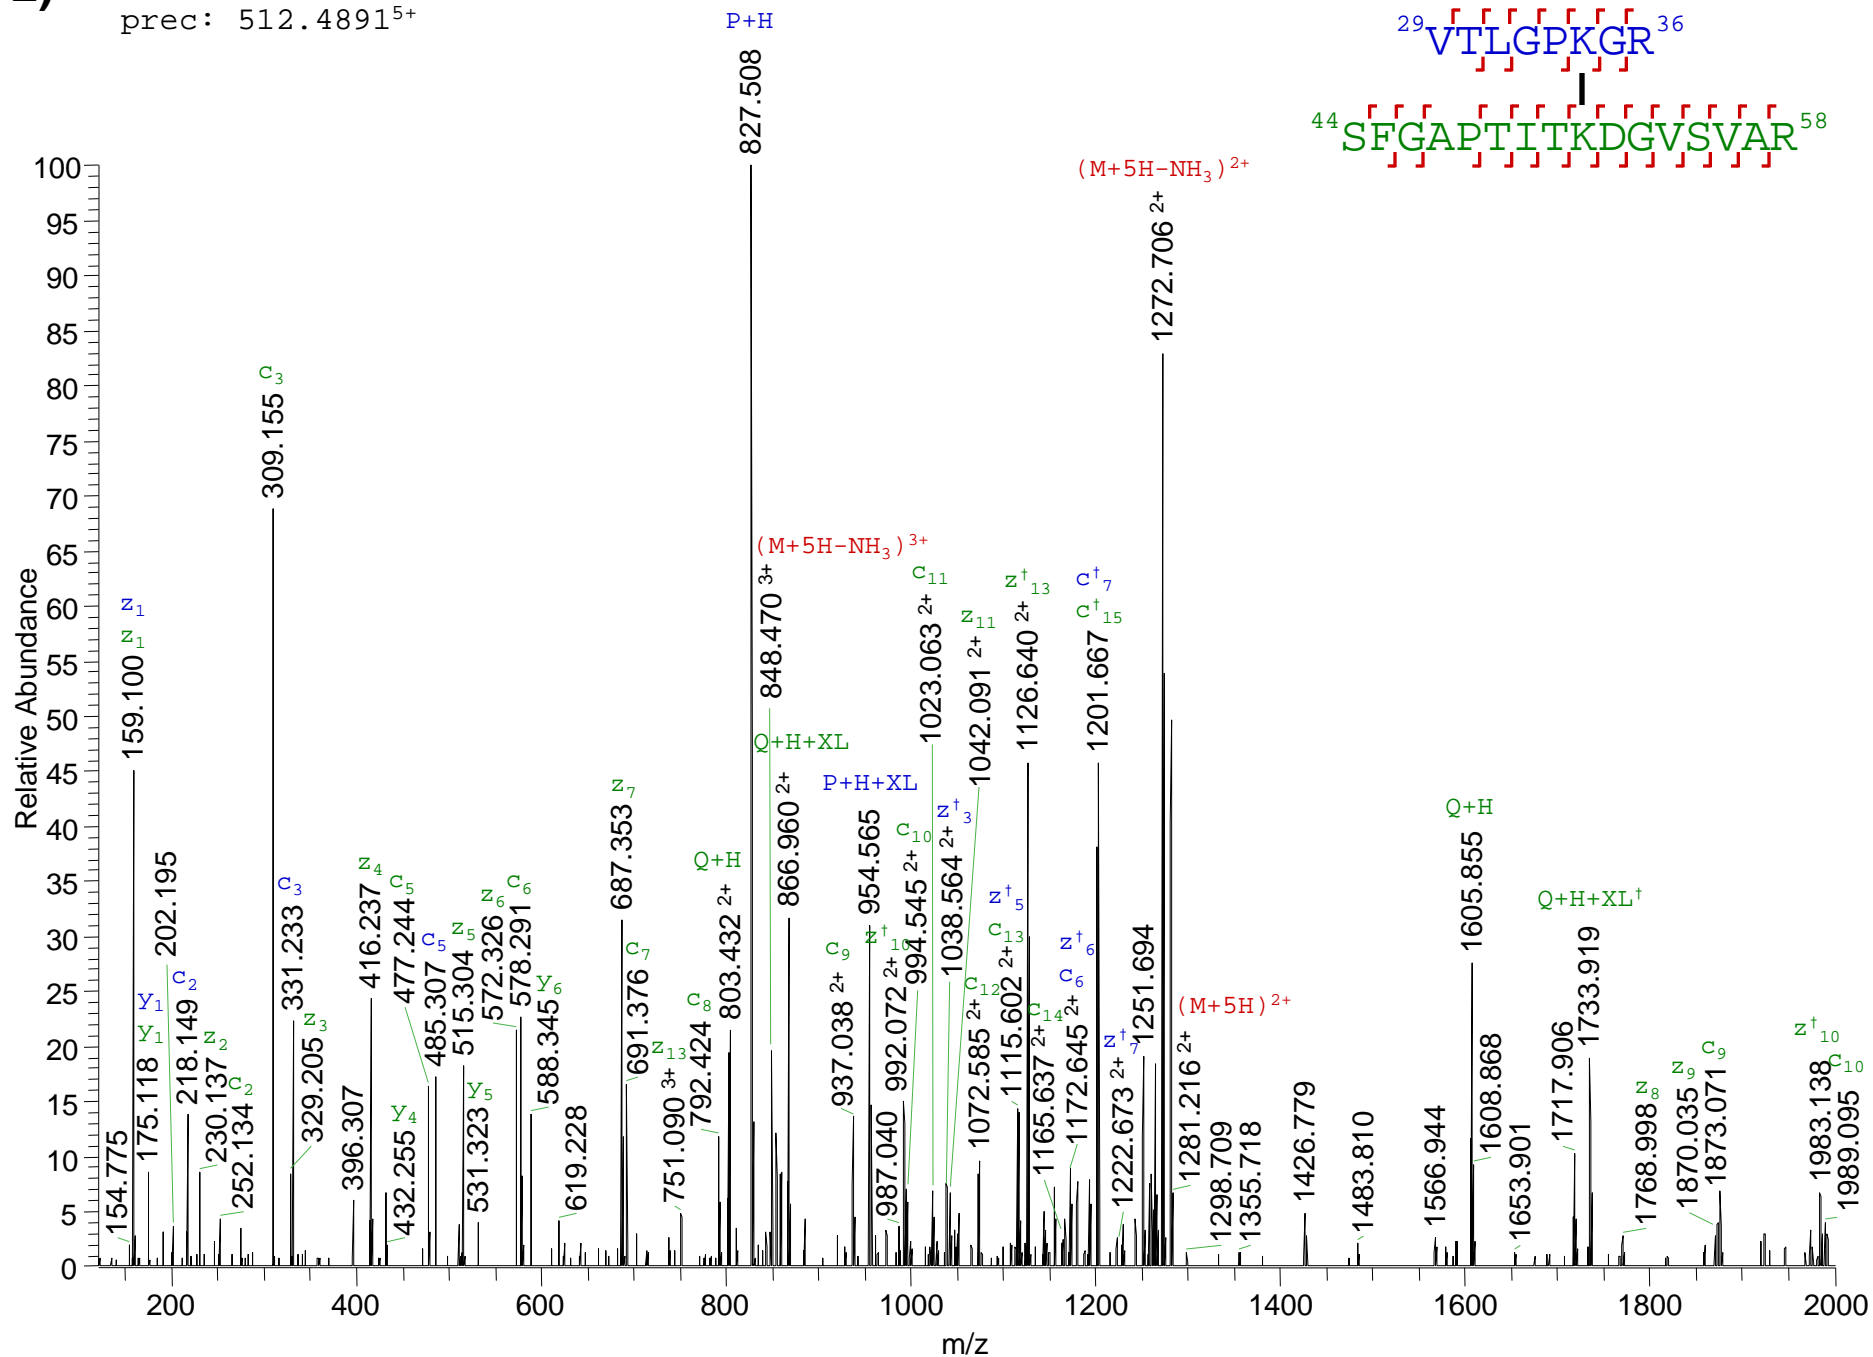

3)

prec: 466.0601<sup>5+</sup>

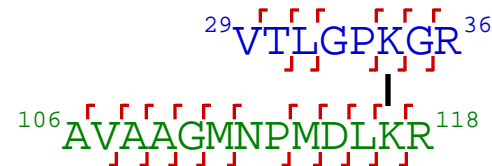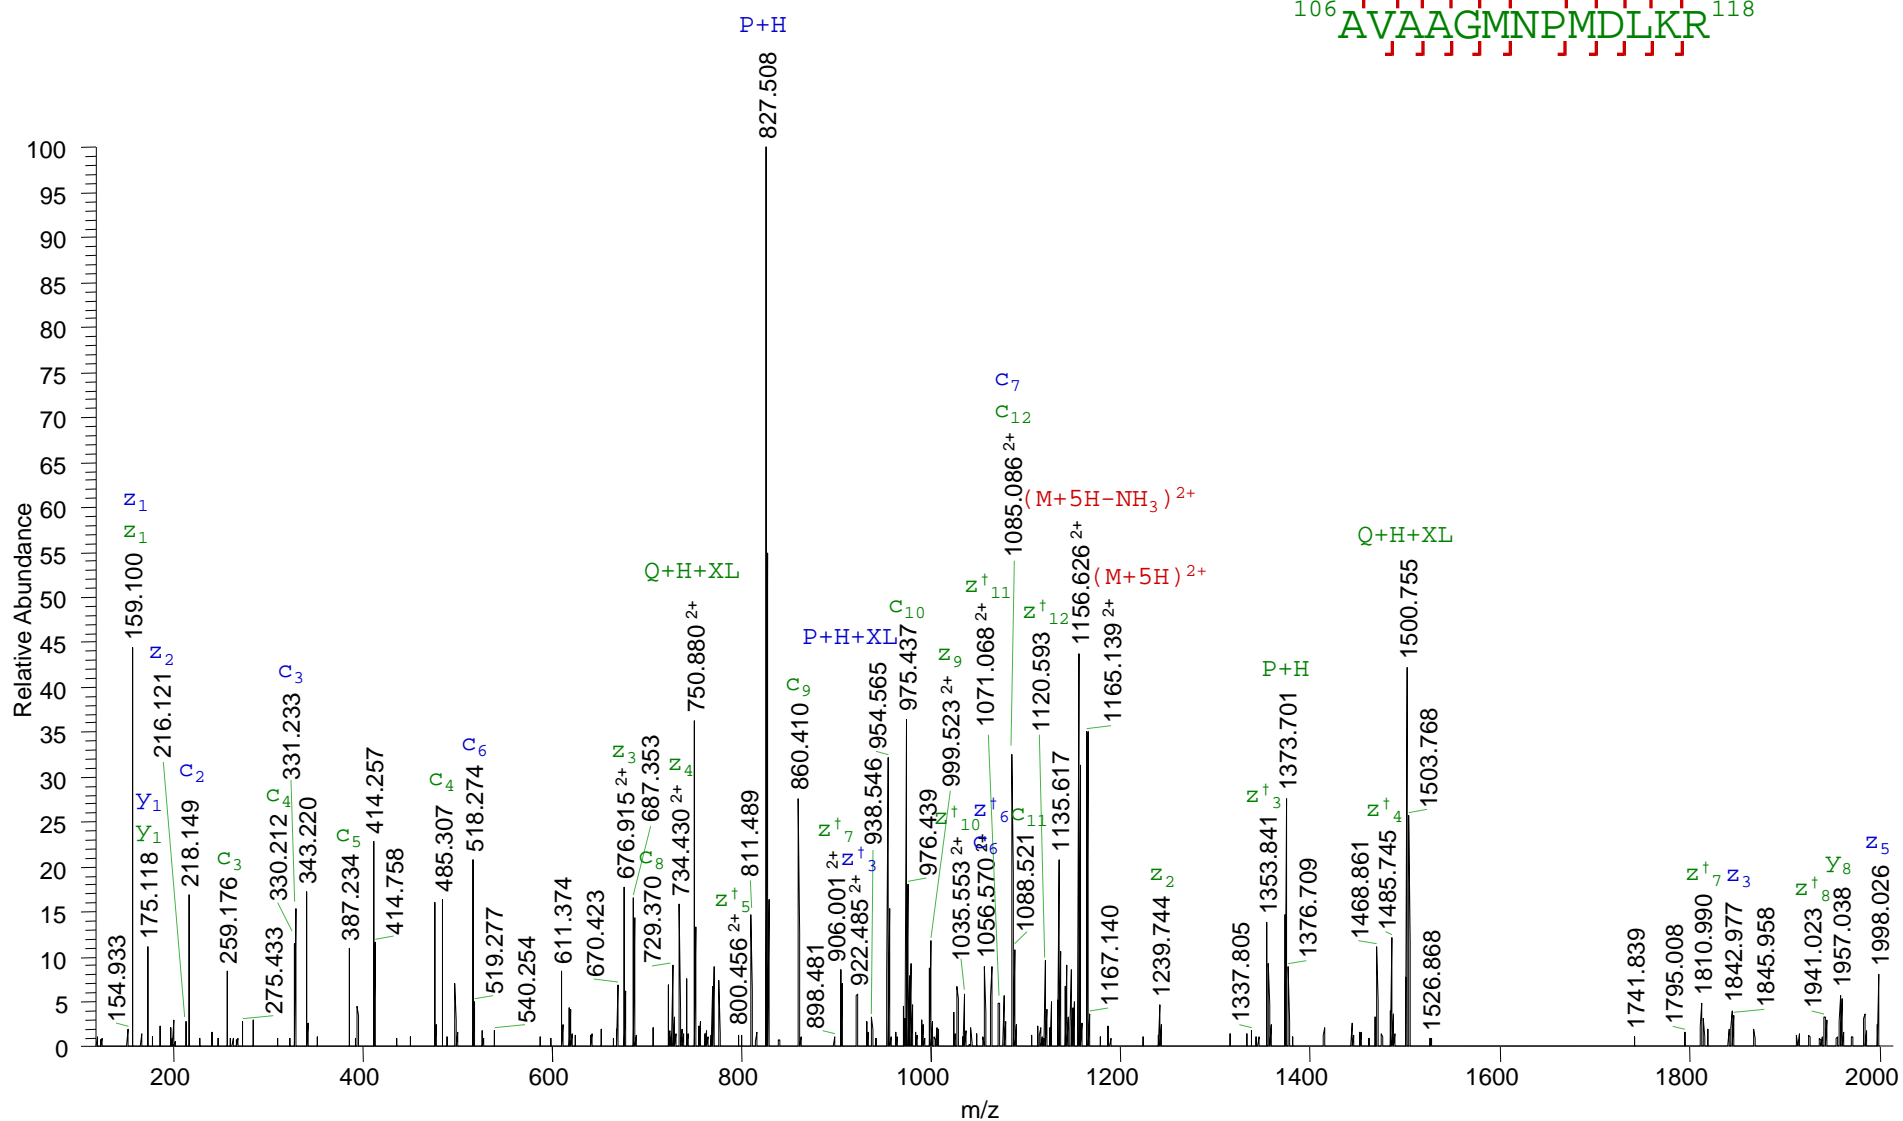

4)

prec: 602.1249<sup>5+</sup>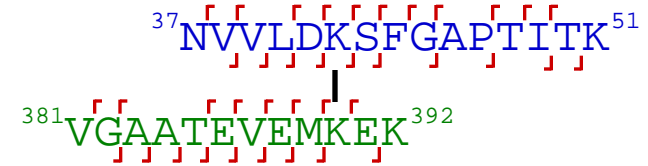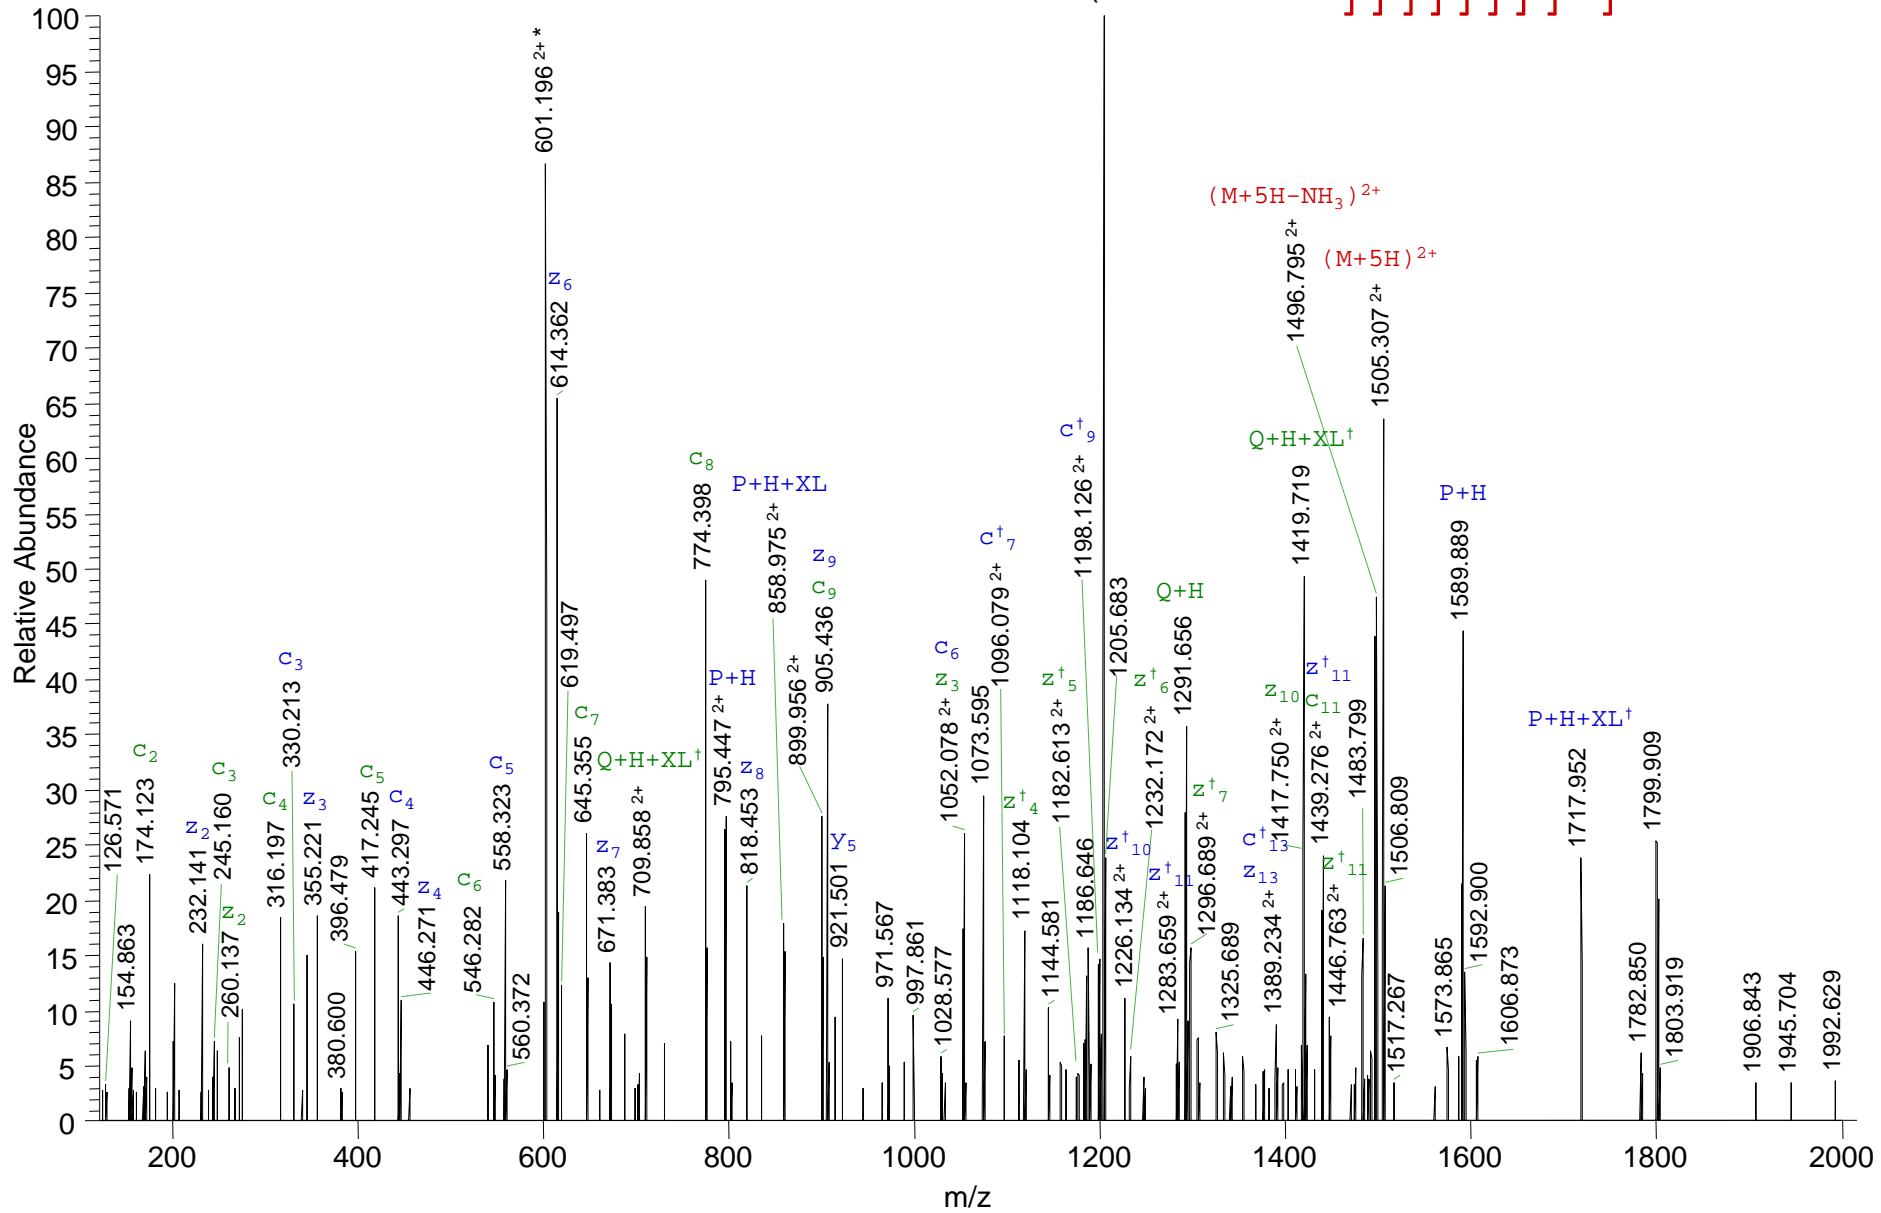

5)

prec: 518.2780<sup>6+</sup>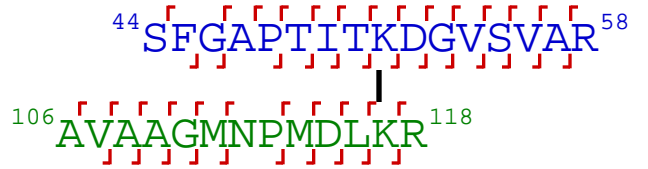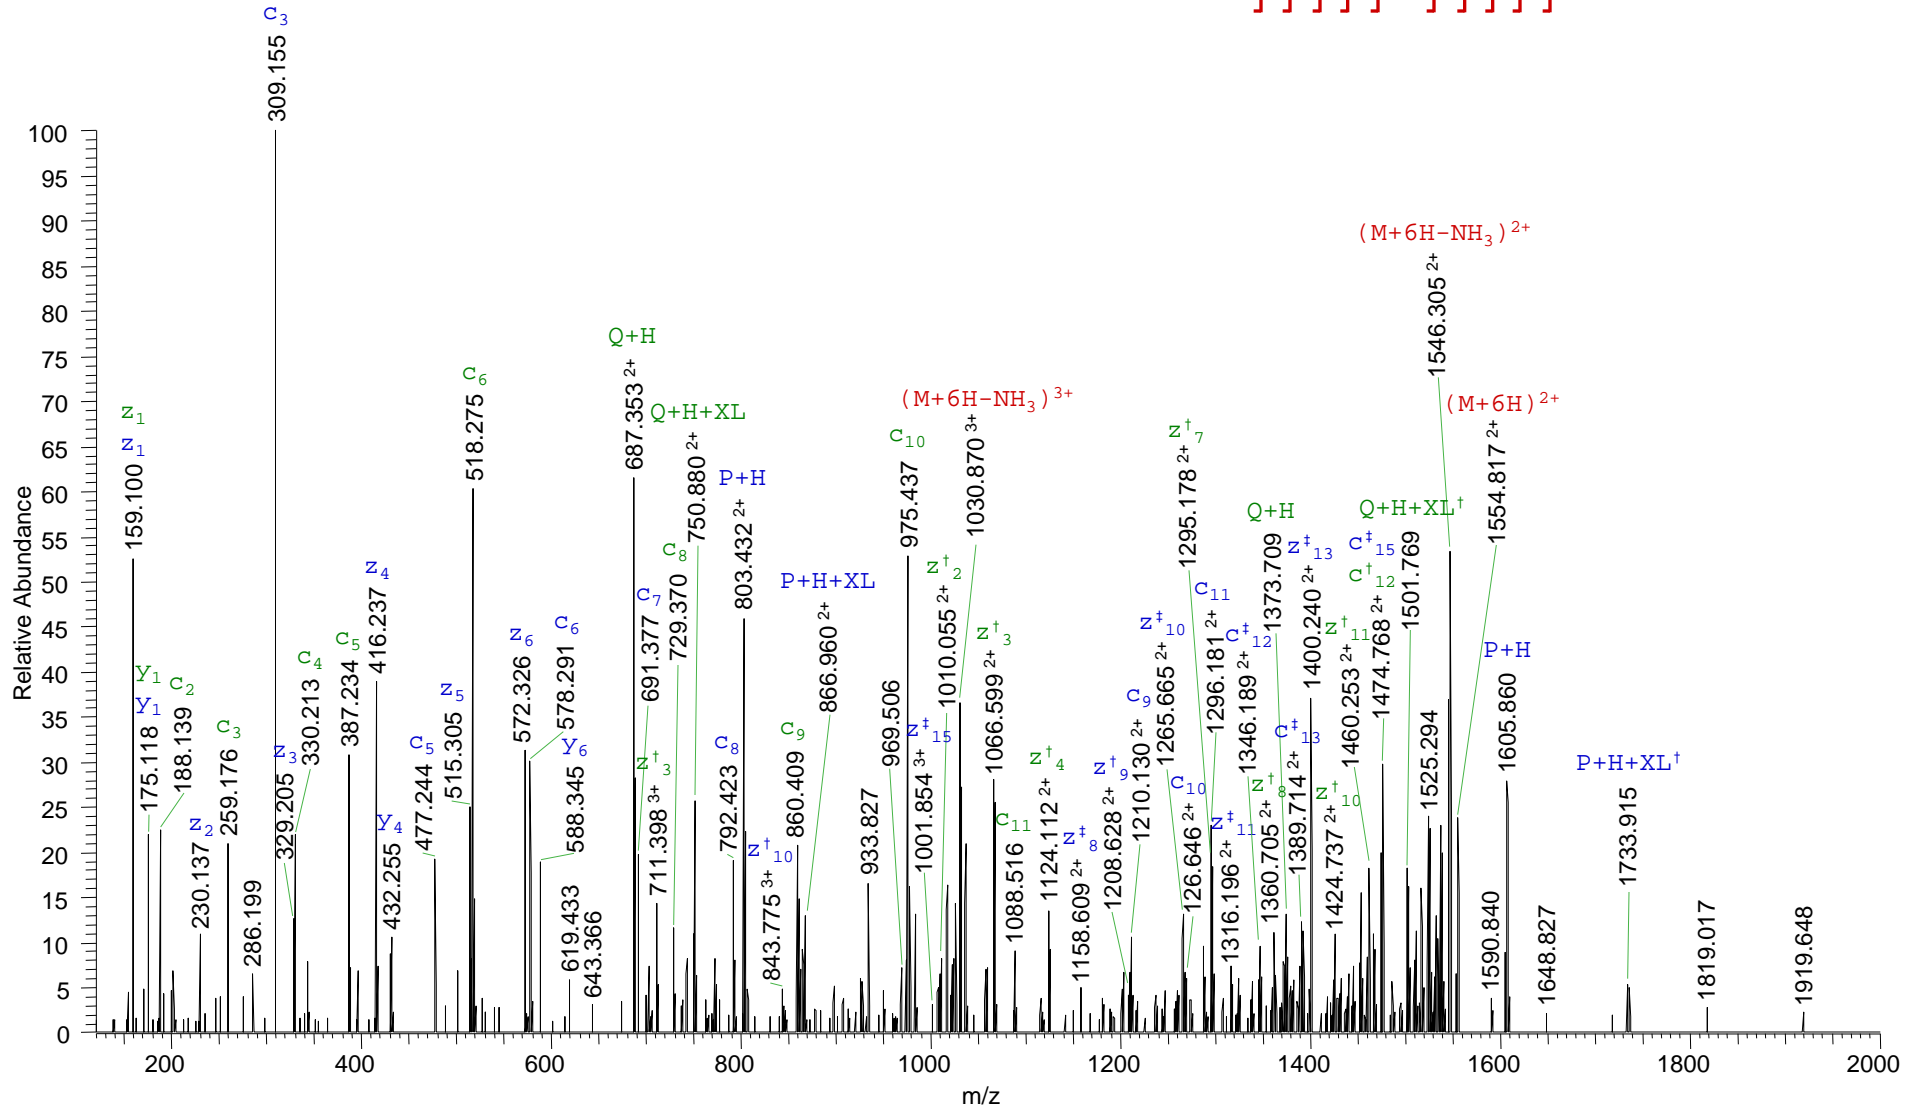

6)

198 [ GYLSPYFINKPETGAVELESPFILLADKK ] 226  
 226 [ KISNIR ] 231

prec: 819.8527<sup>5+</sup>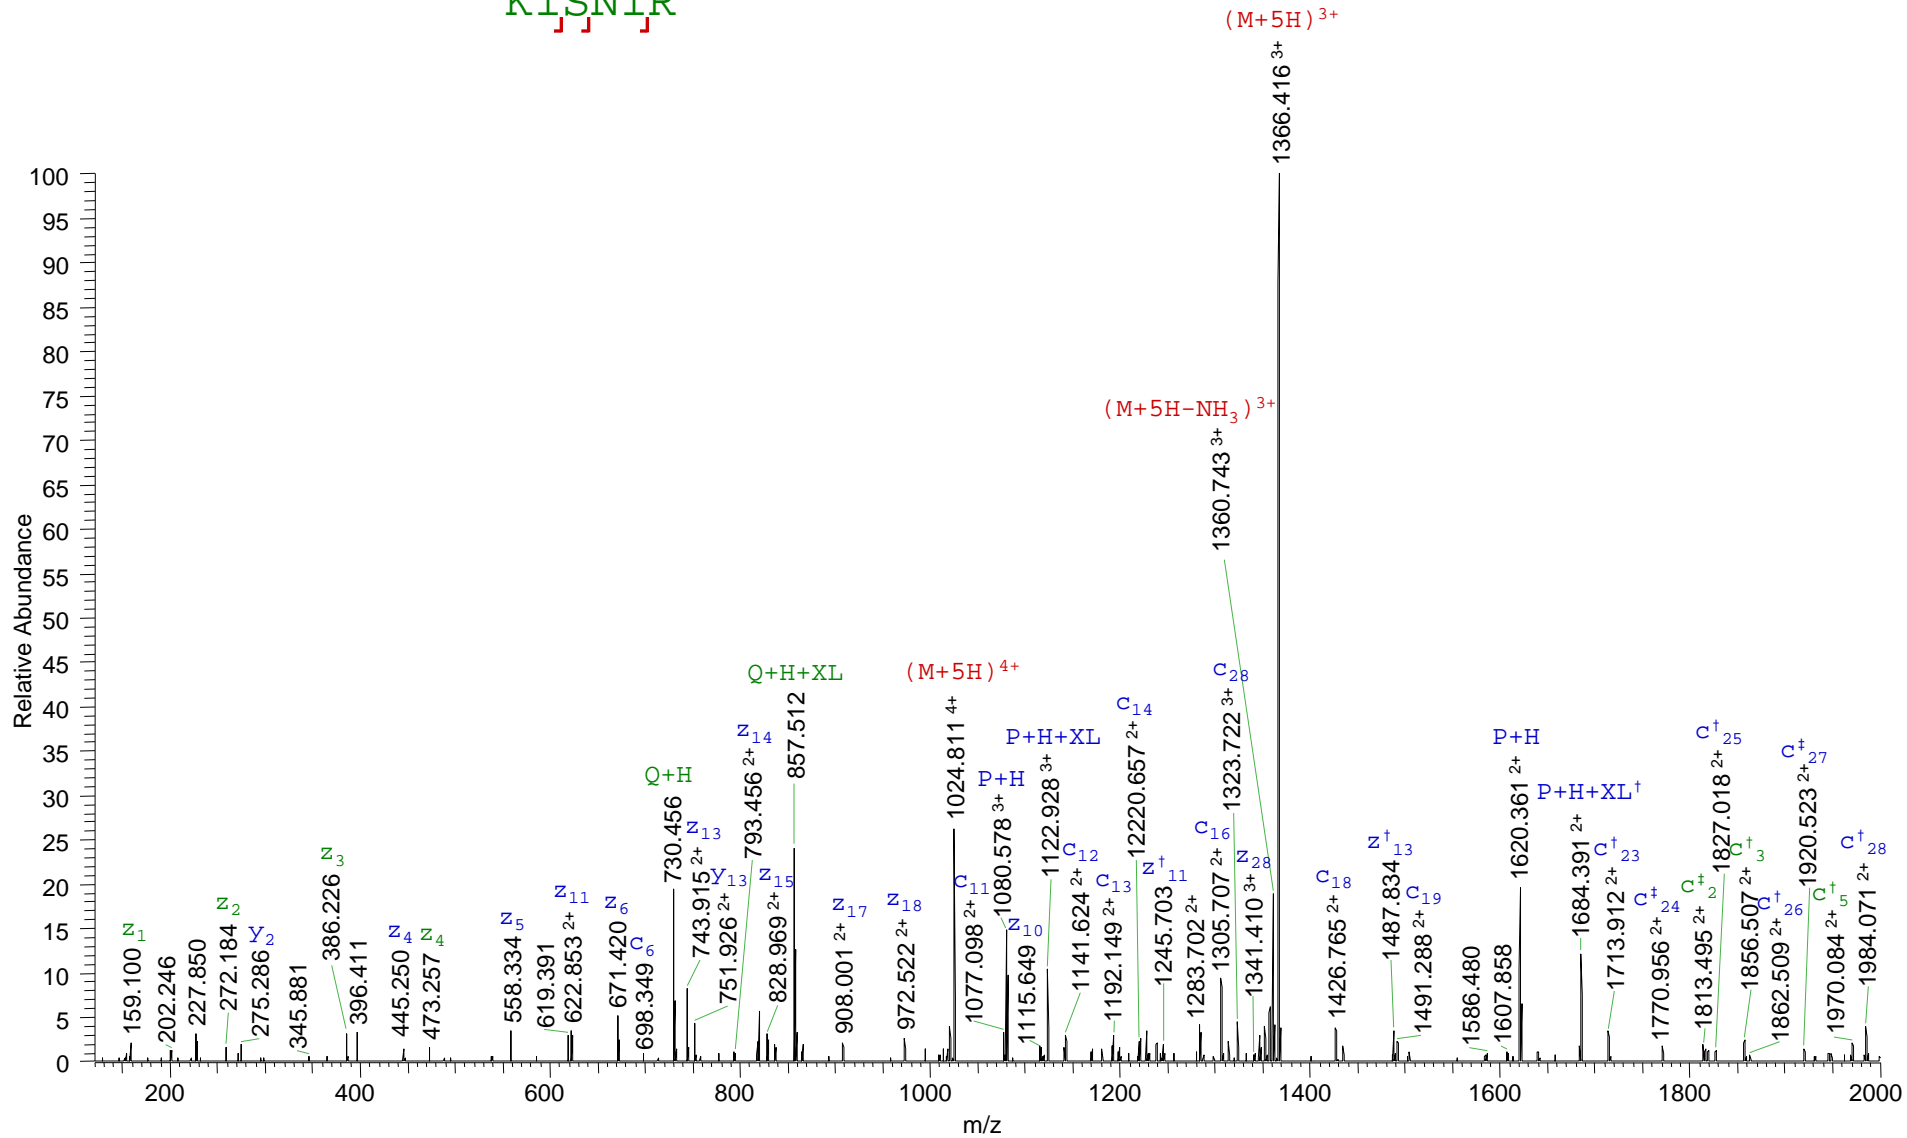

7)

prec: 709.07076<sup>+</sup>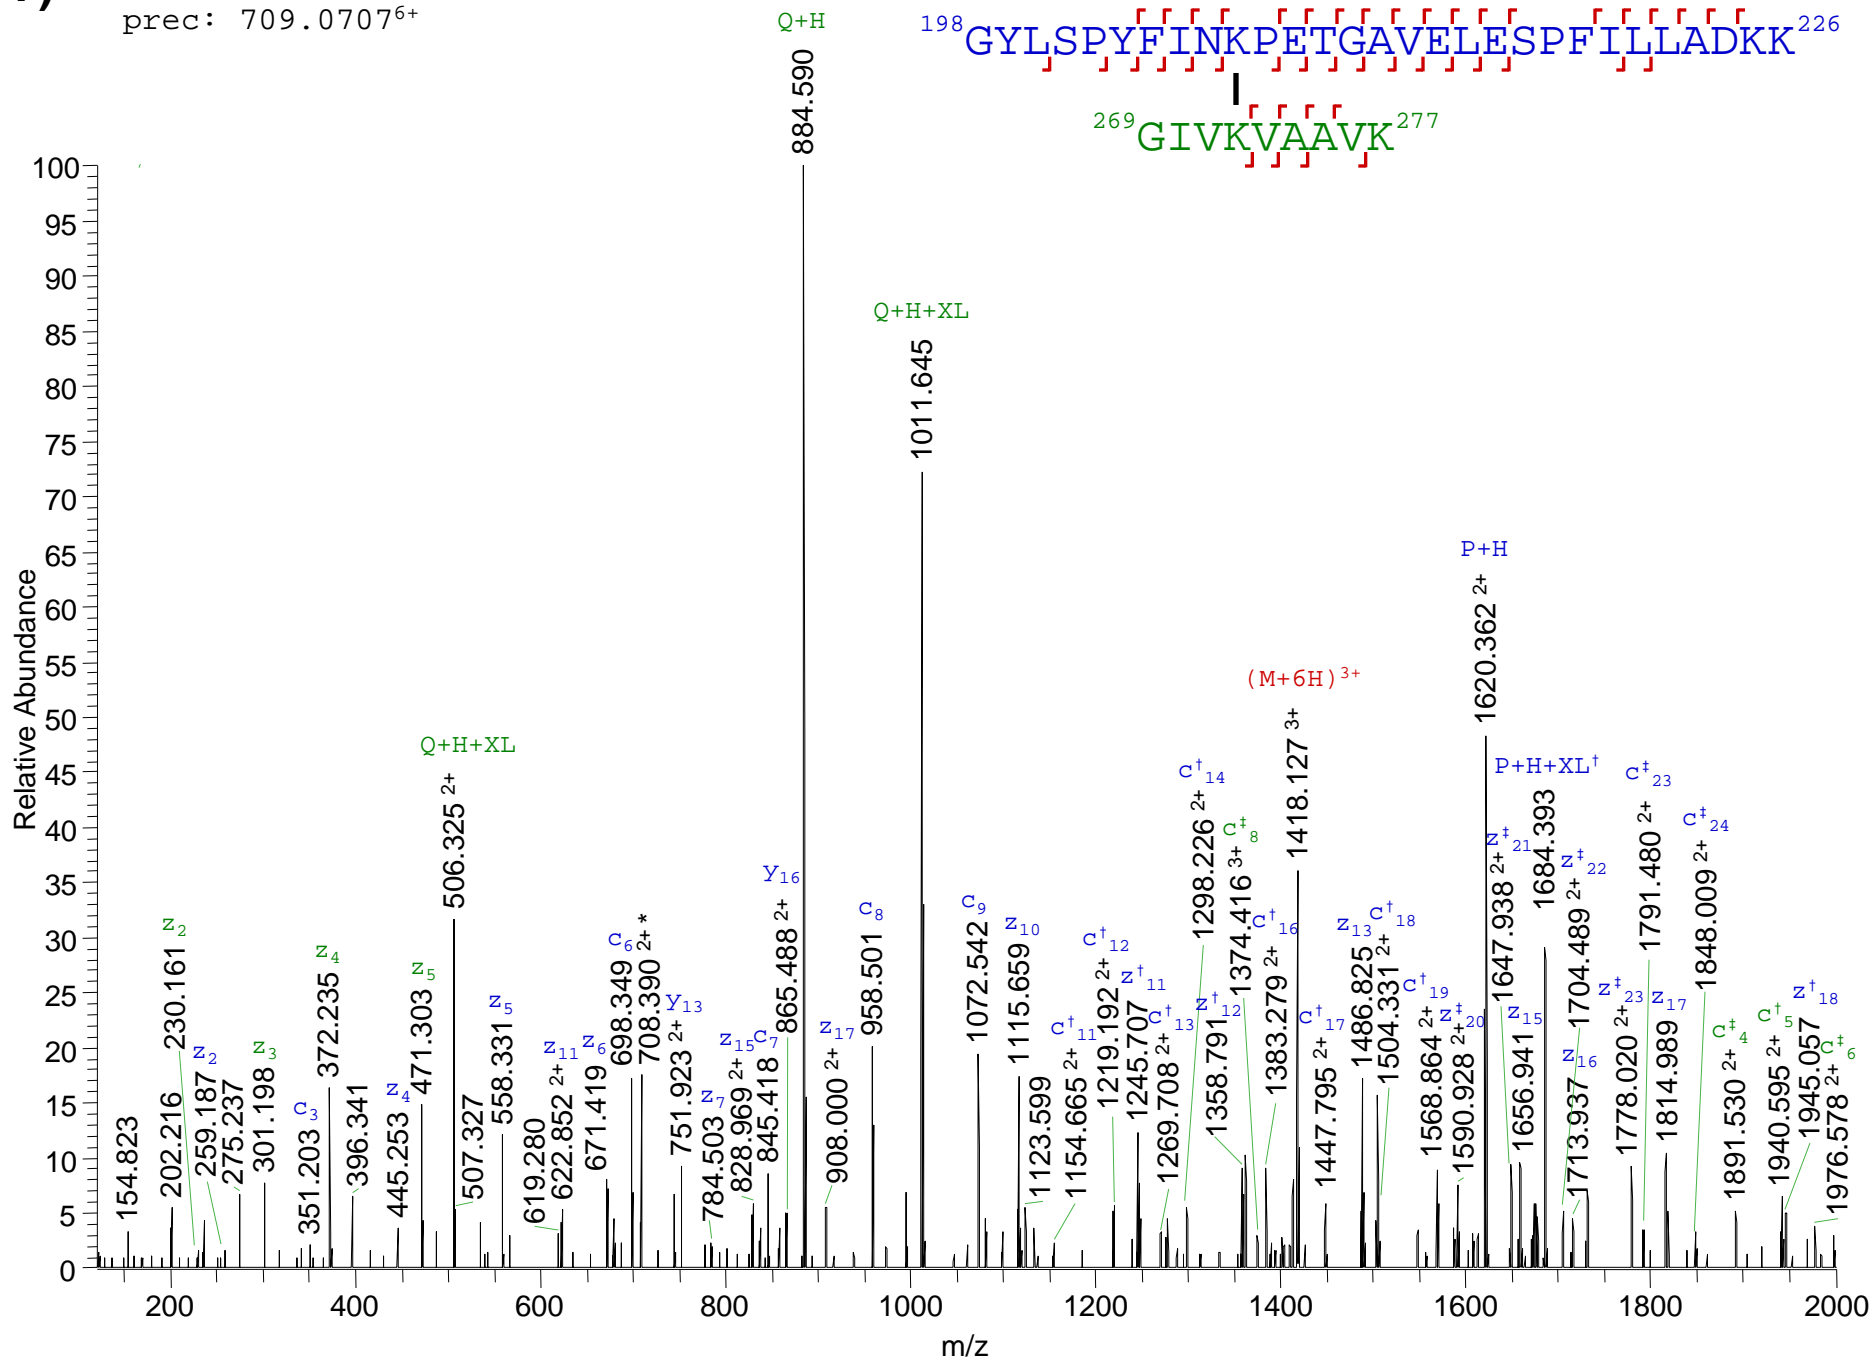



8)

<sup>198</sup>GYLSPYFINKPETGAVELESPFILLADKK<sup>226</sup>
prec: 776.9112<sup>6+</sup>
<sup>380</sup>VGAATEVEMKEK<sup>392</sup>
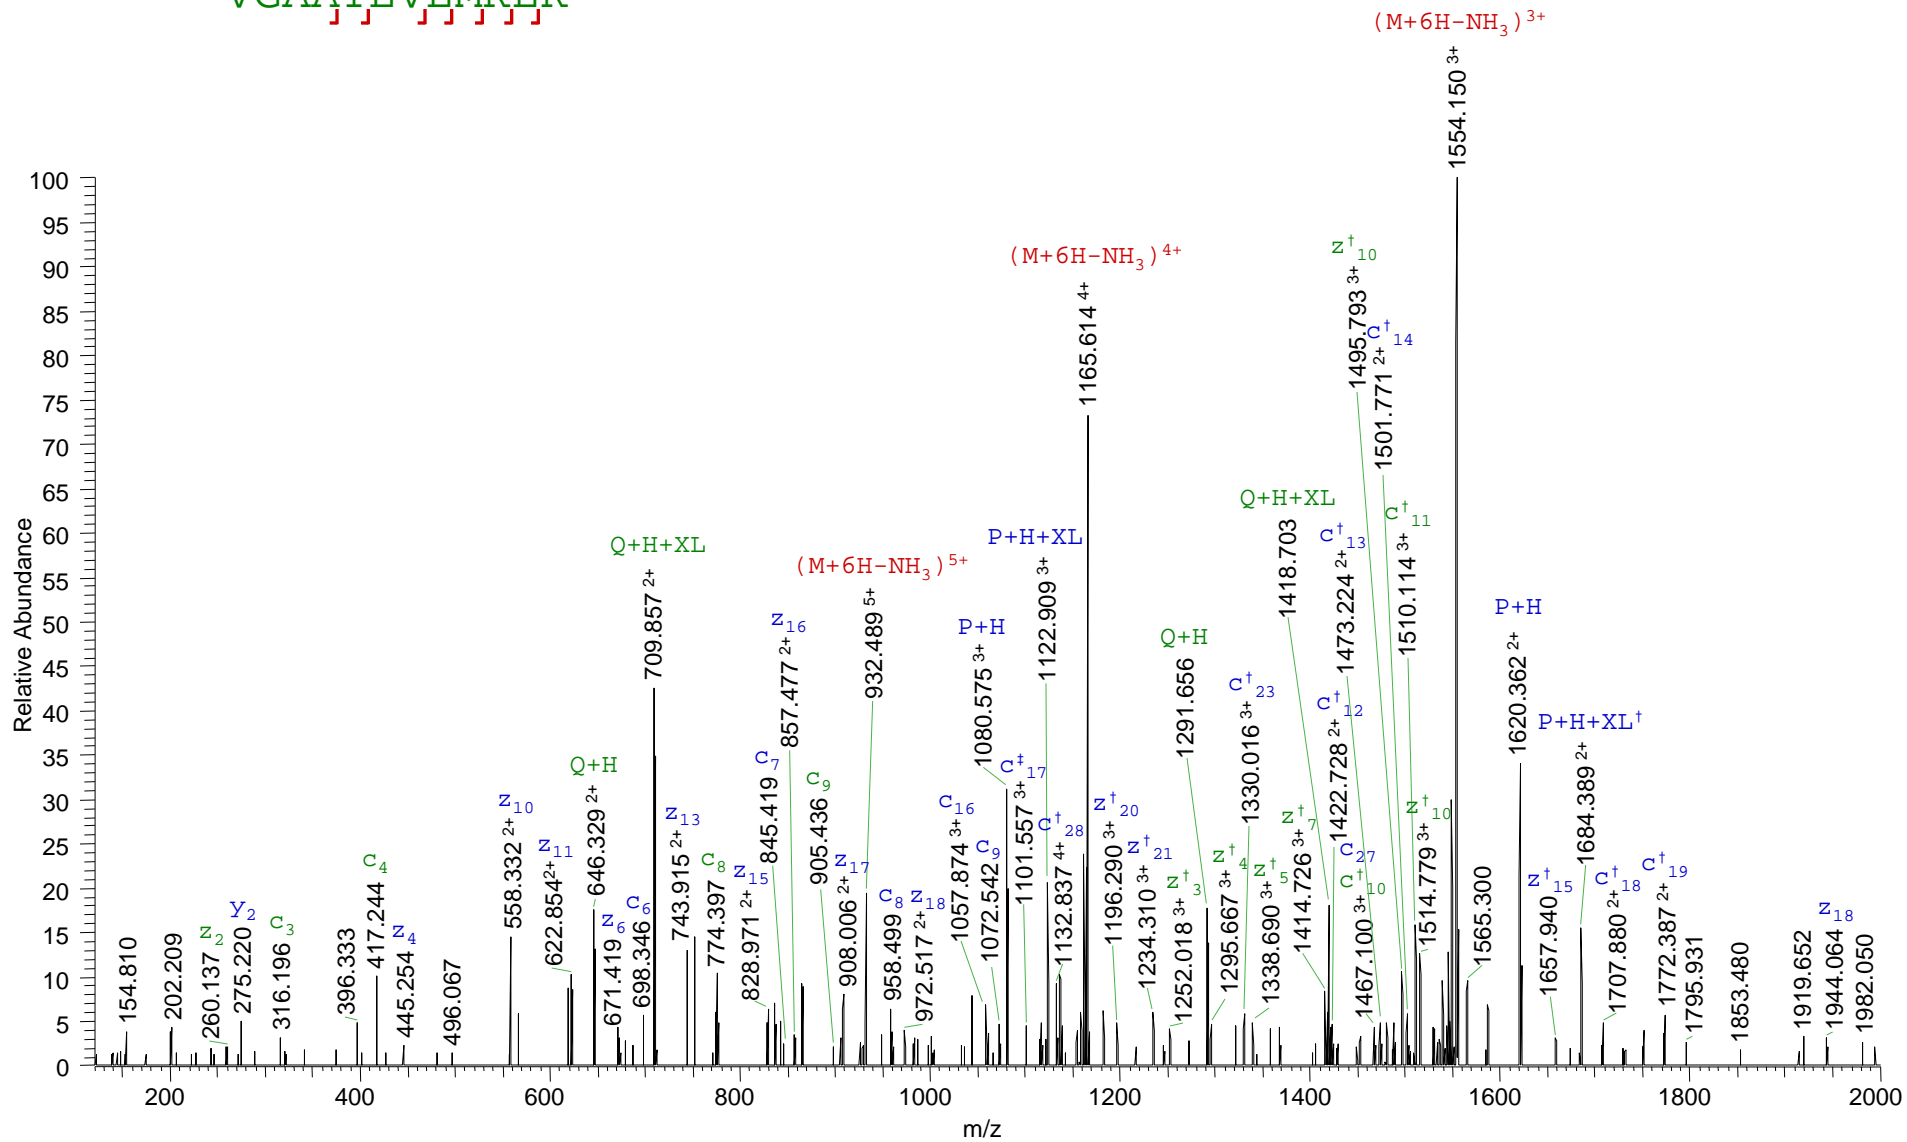



10)

prec: 435.7788<sup>4+</sup>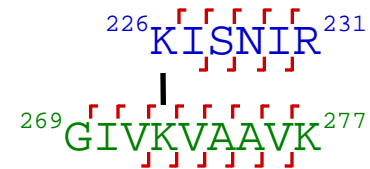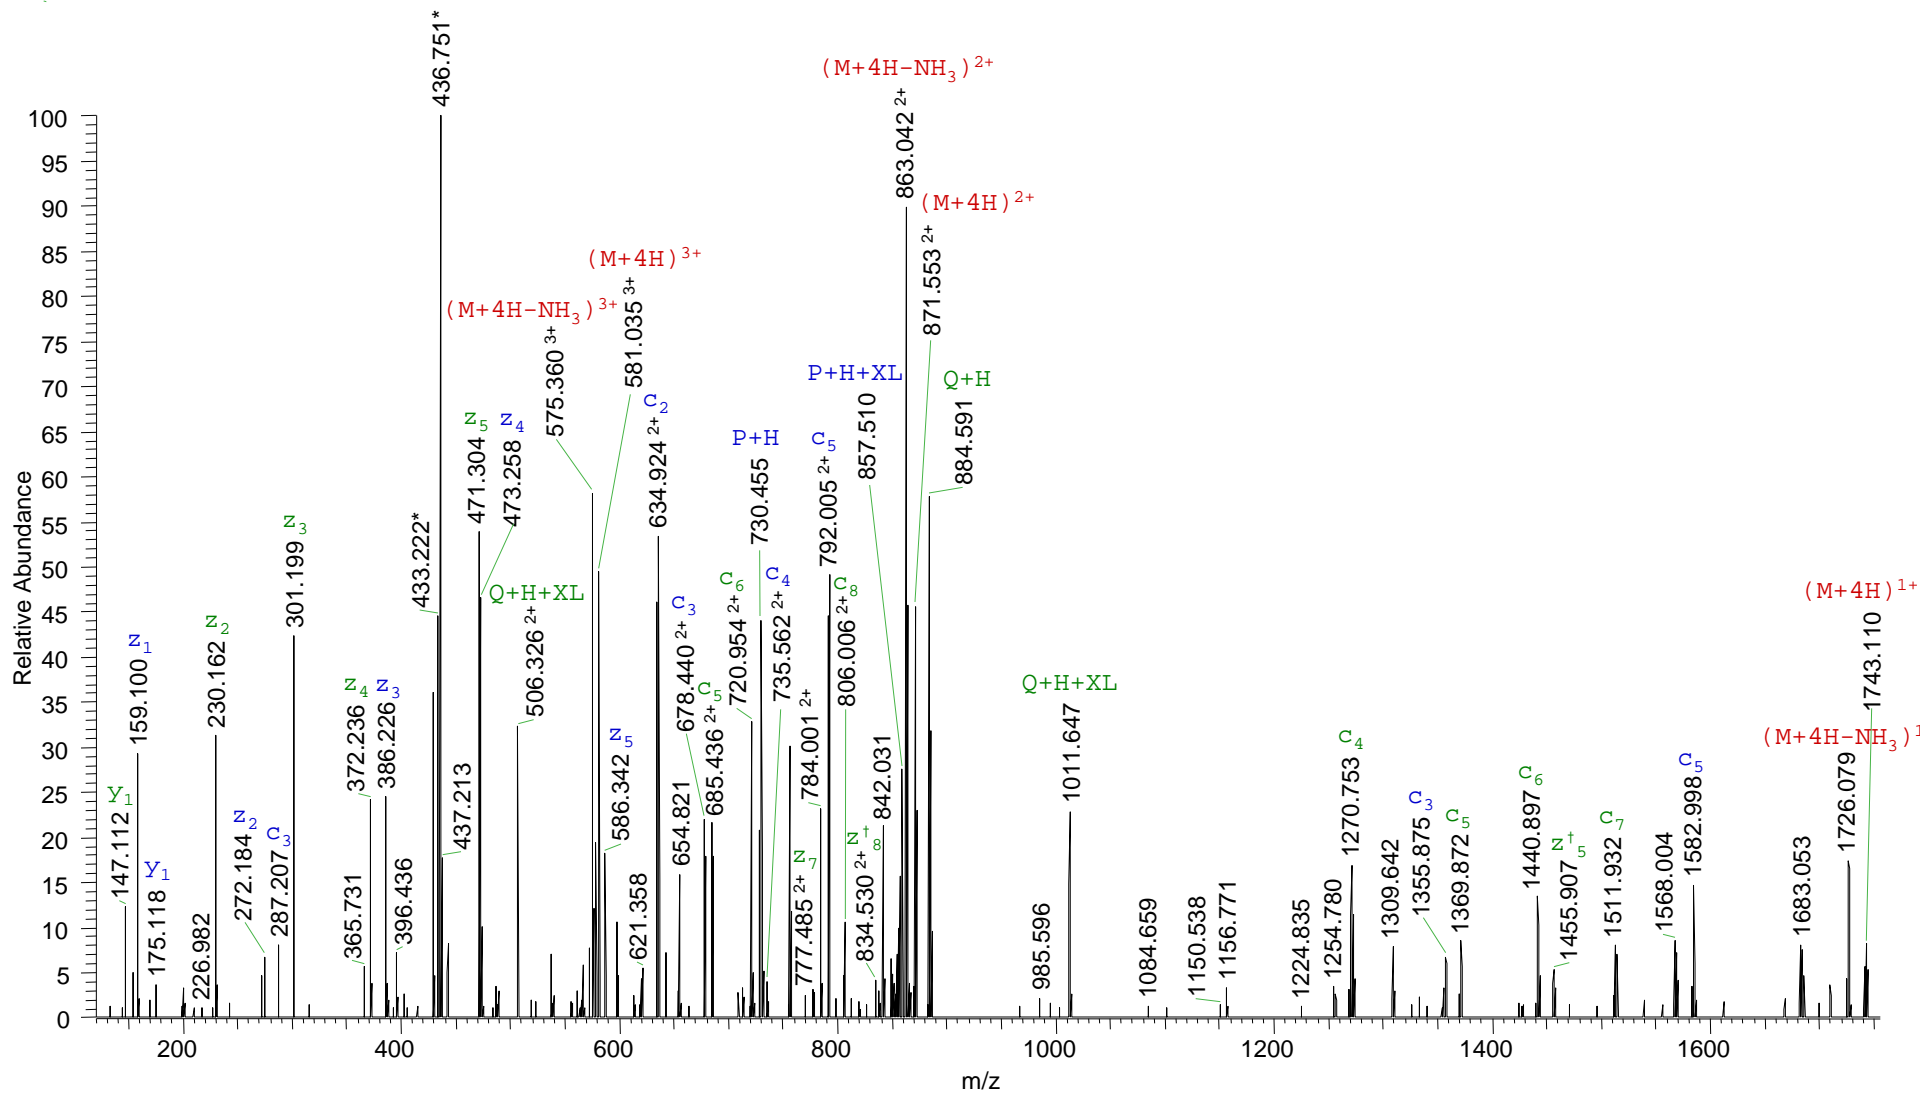

11)

prec: 511.5458<sup>4+</sup>

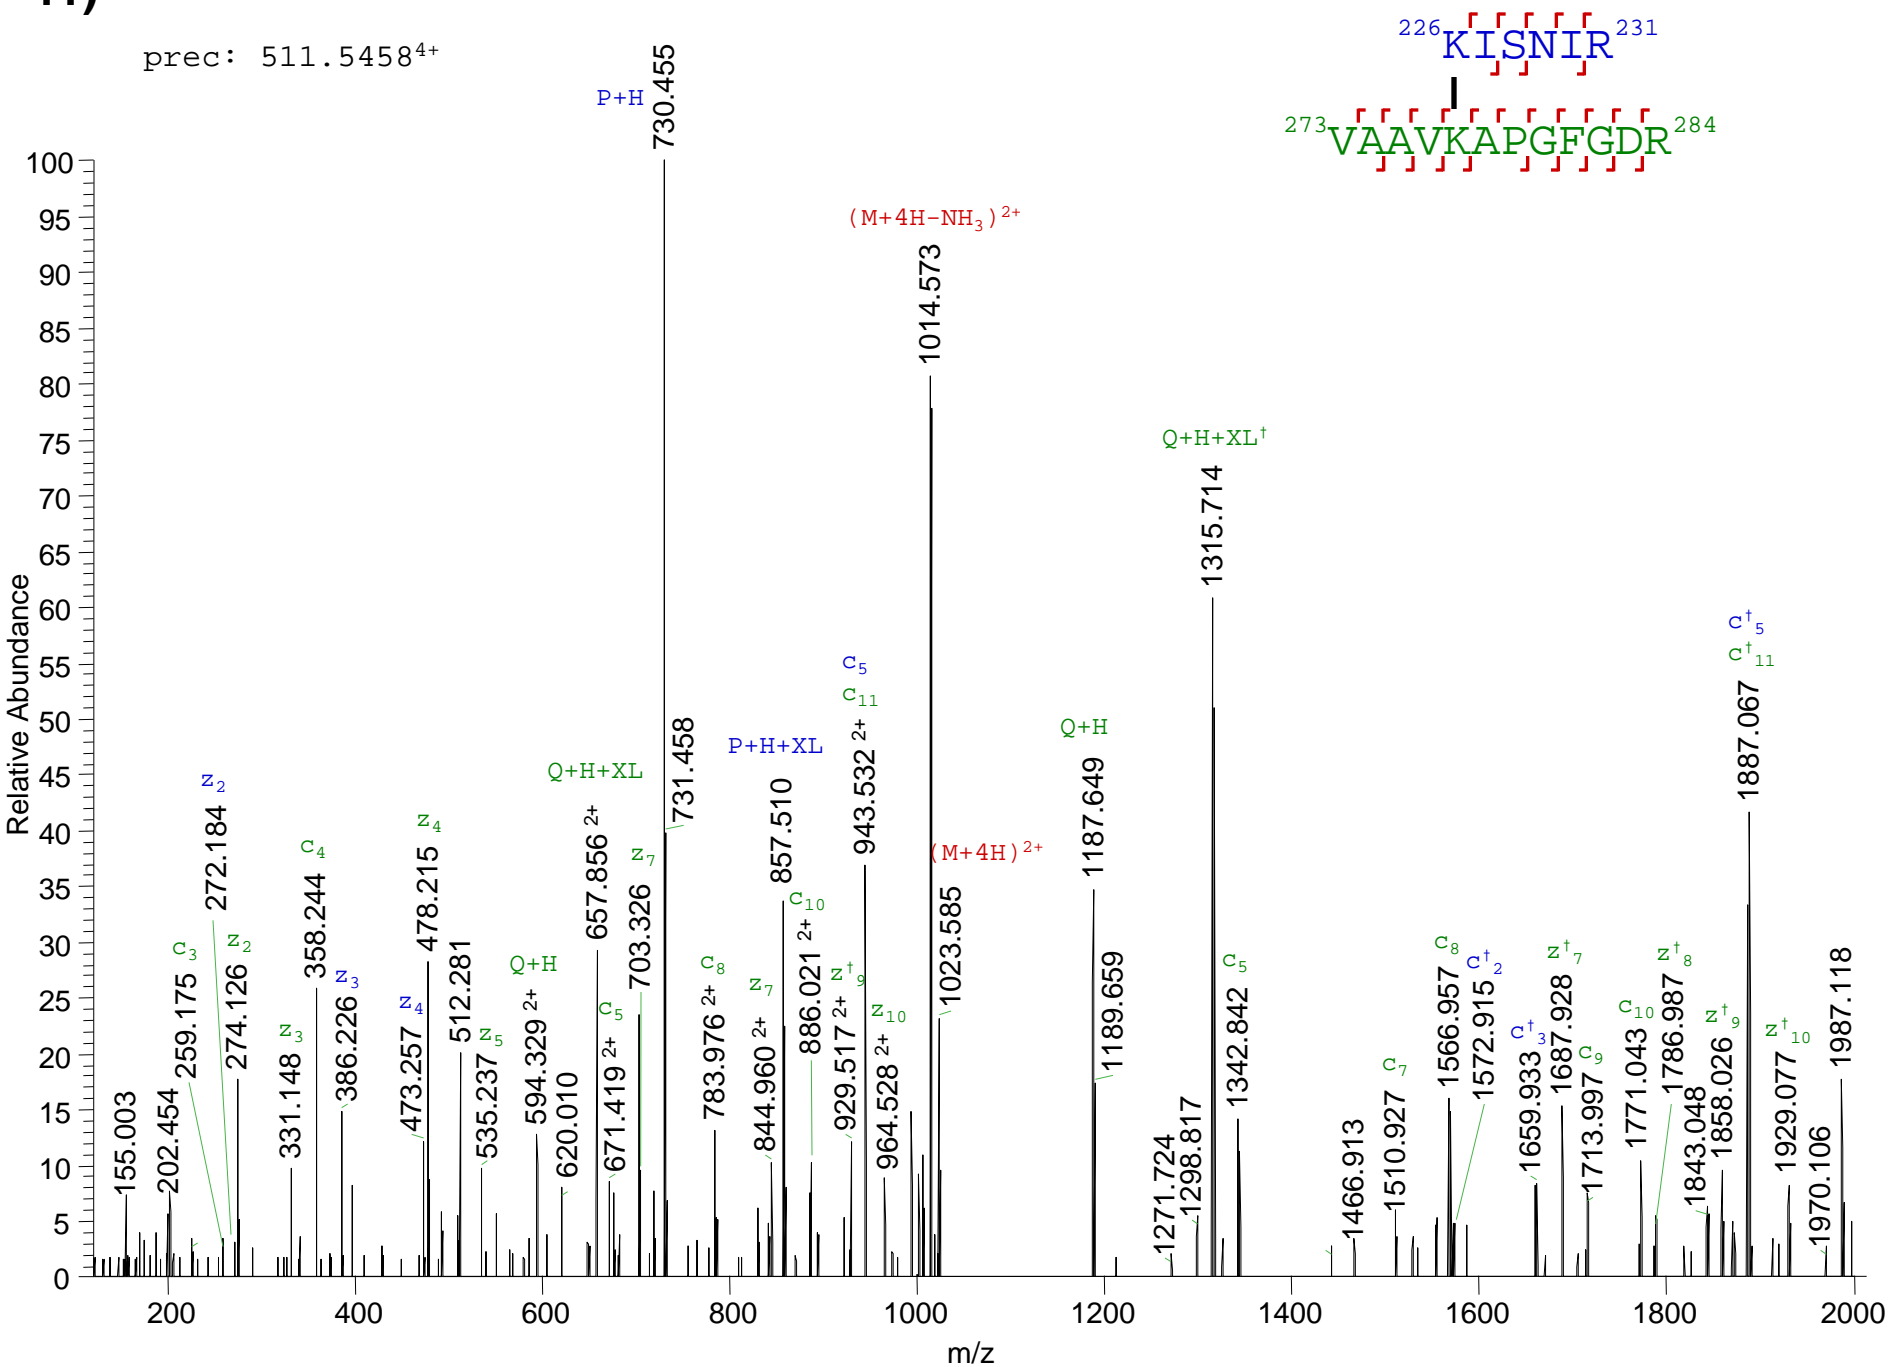

12)

prec: 515.0414<sup>4+</sup>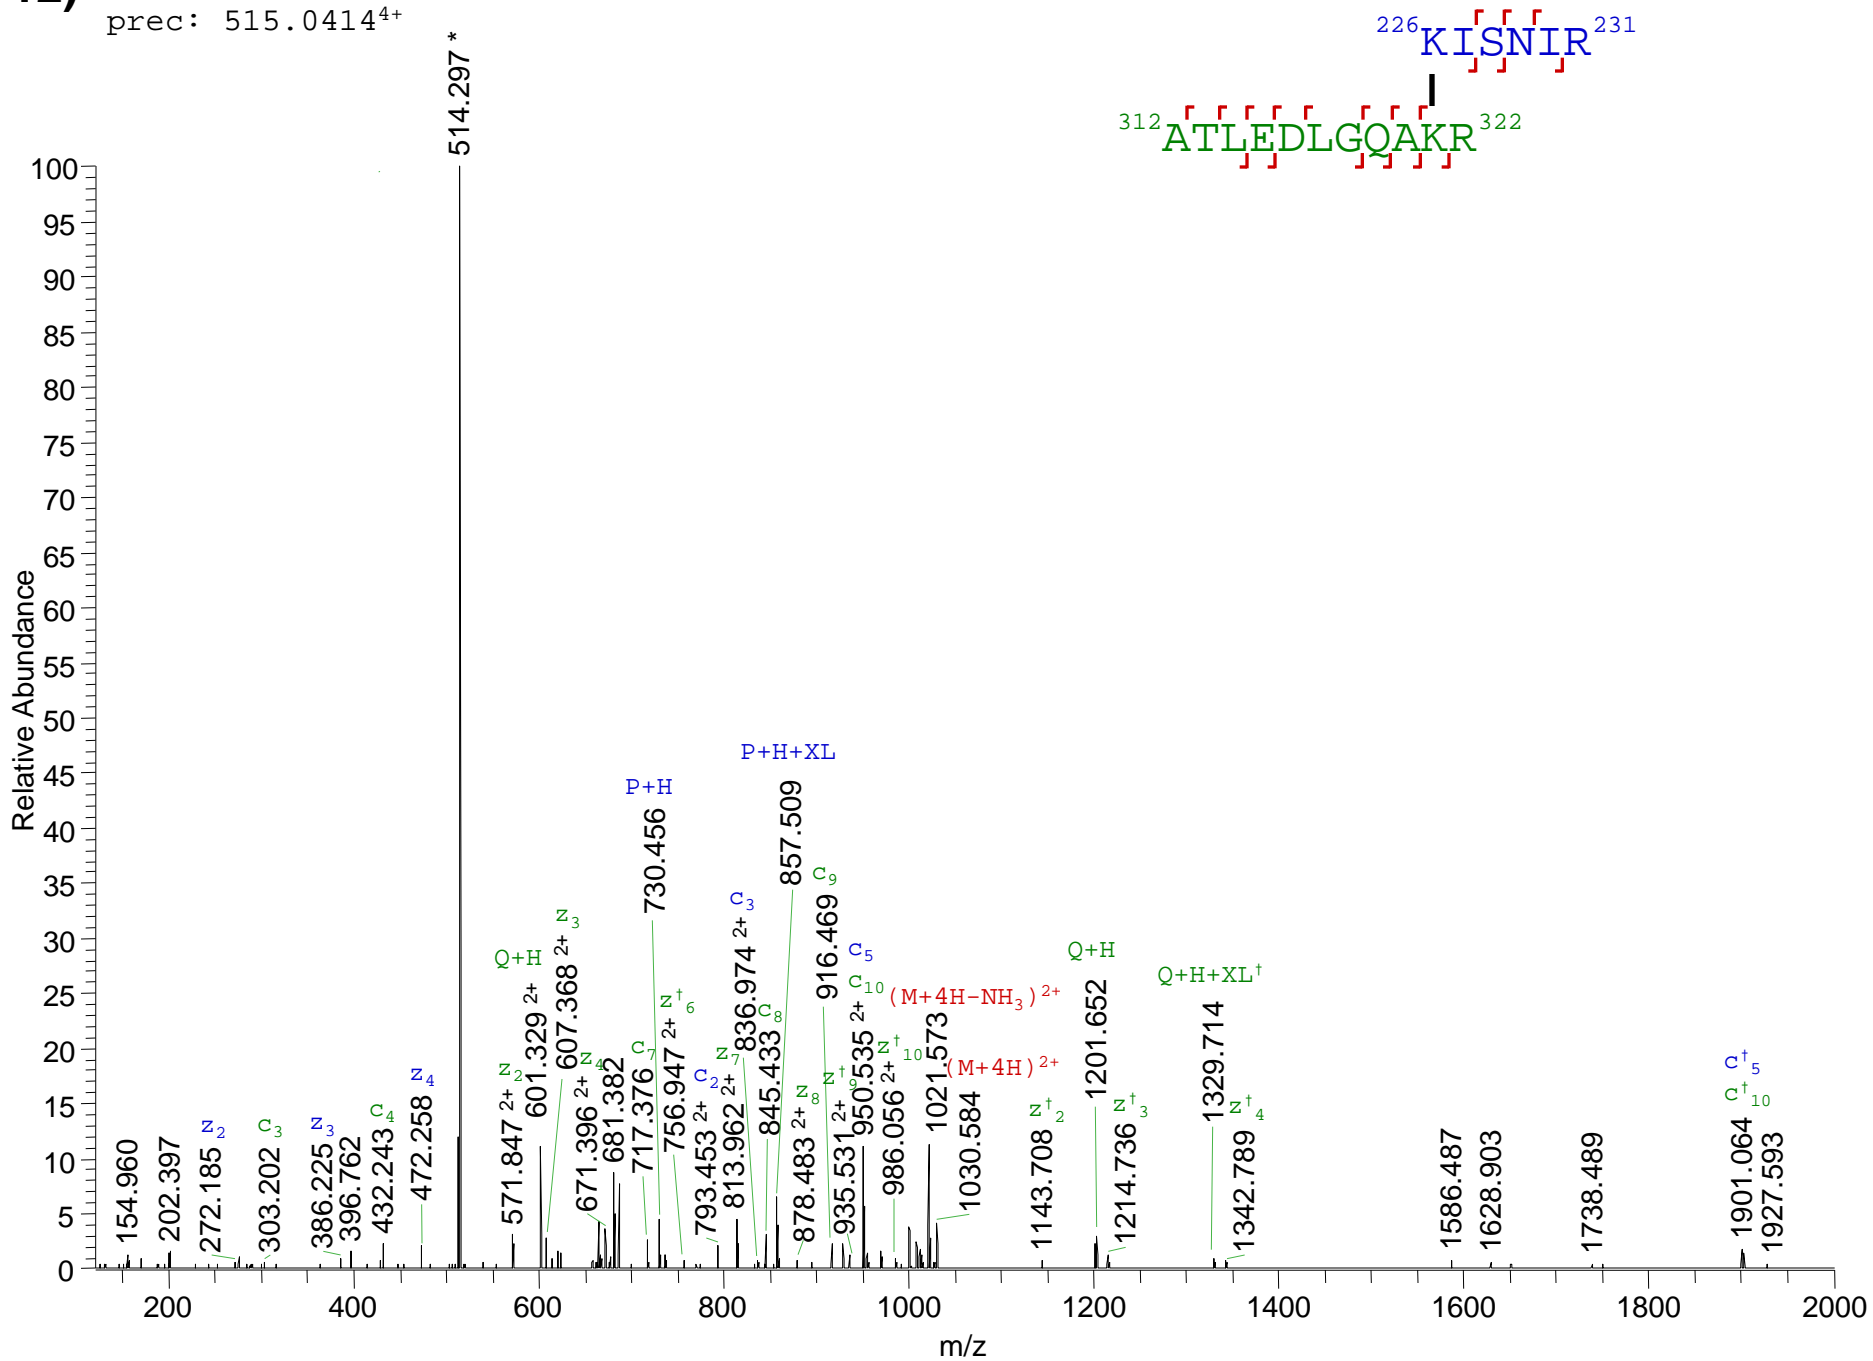

13)

prec: 537.5449<sup>4+</sup>

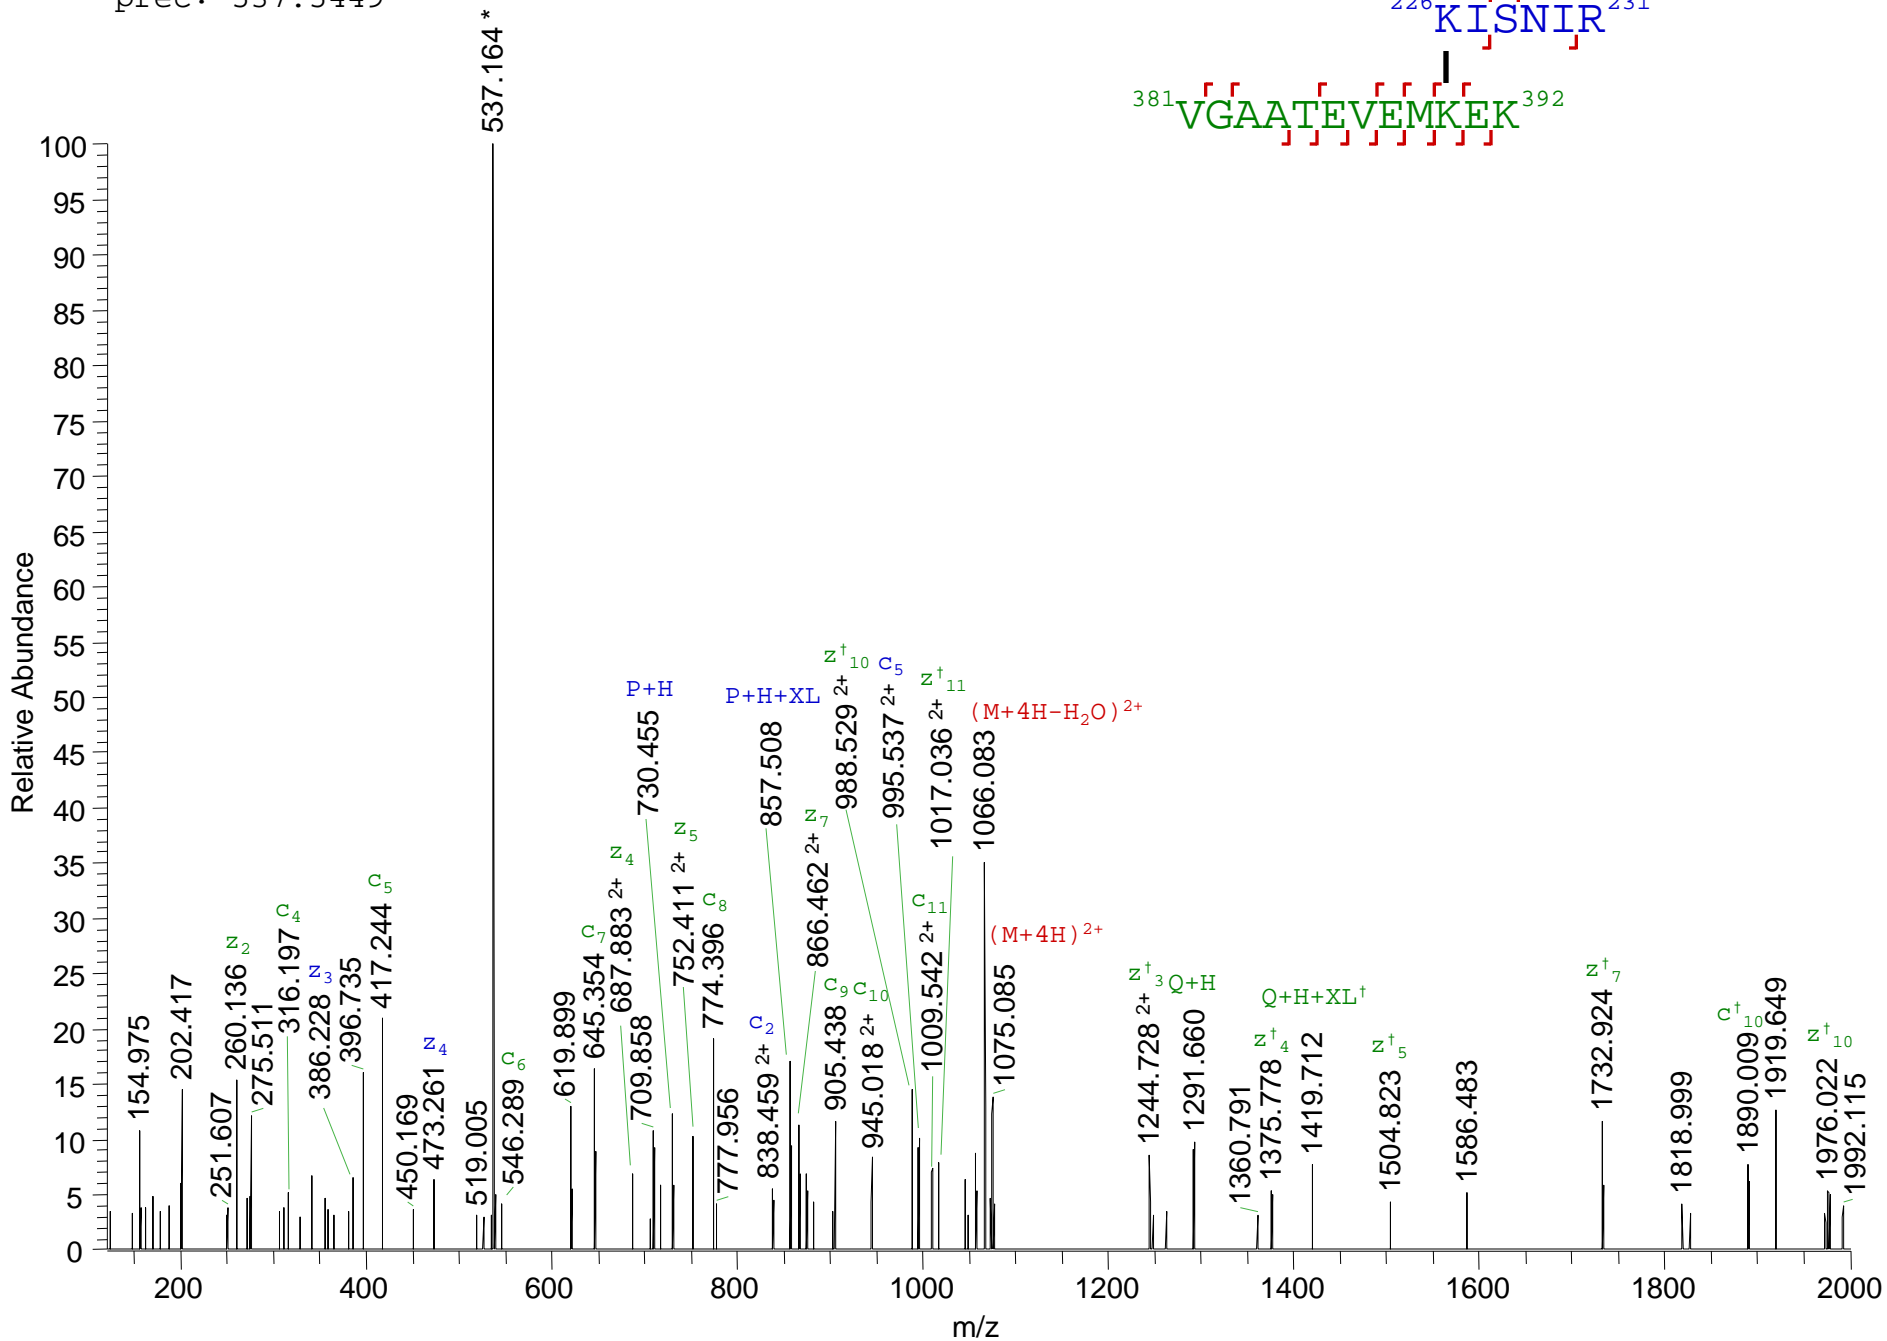

14)

273 VAAVKAPGFGDR 284

381 VQAATEVEM(Ox)KEK 392

prec: 524.8768<sup>5+</sup>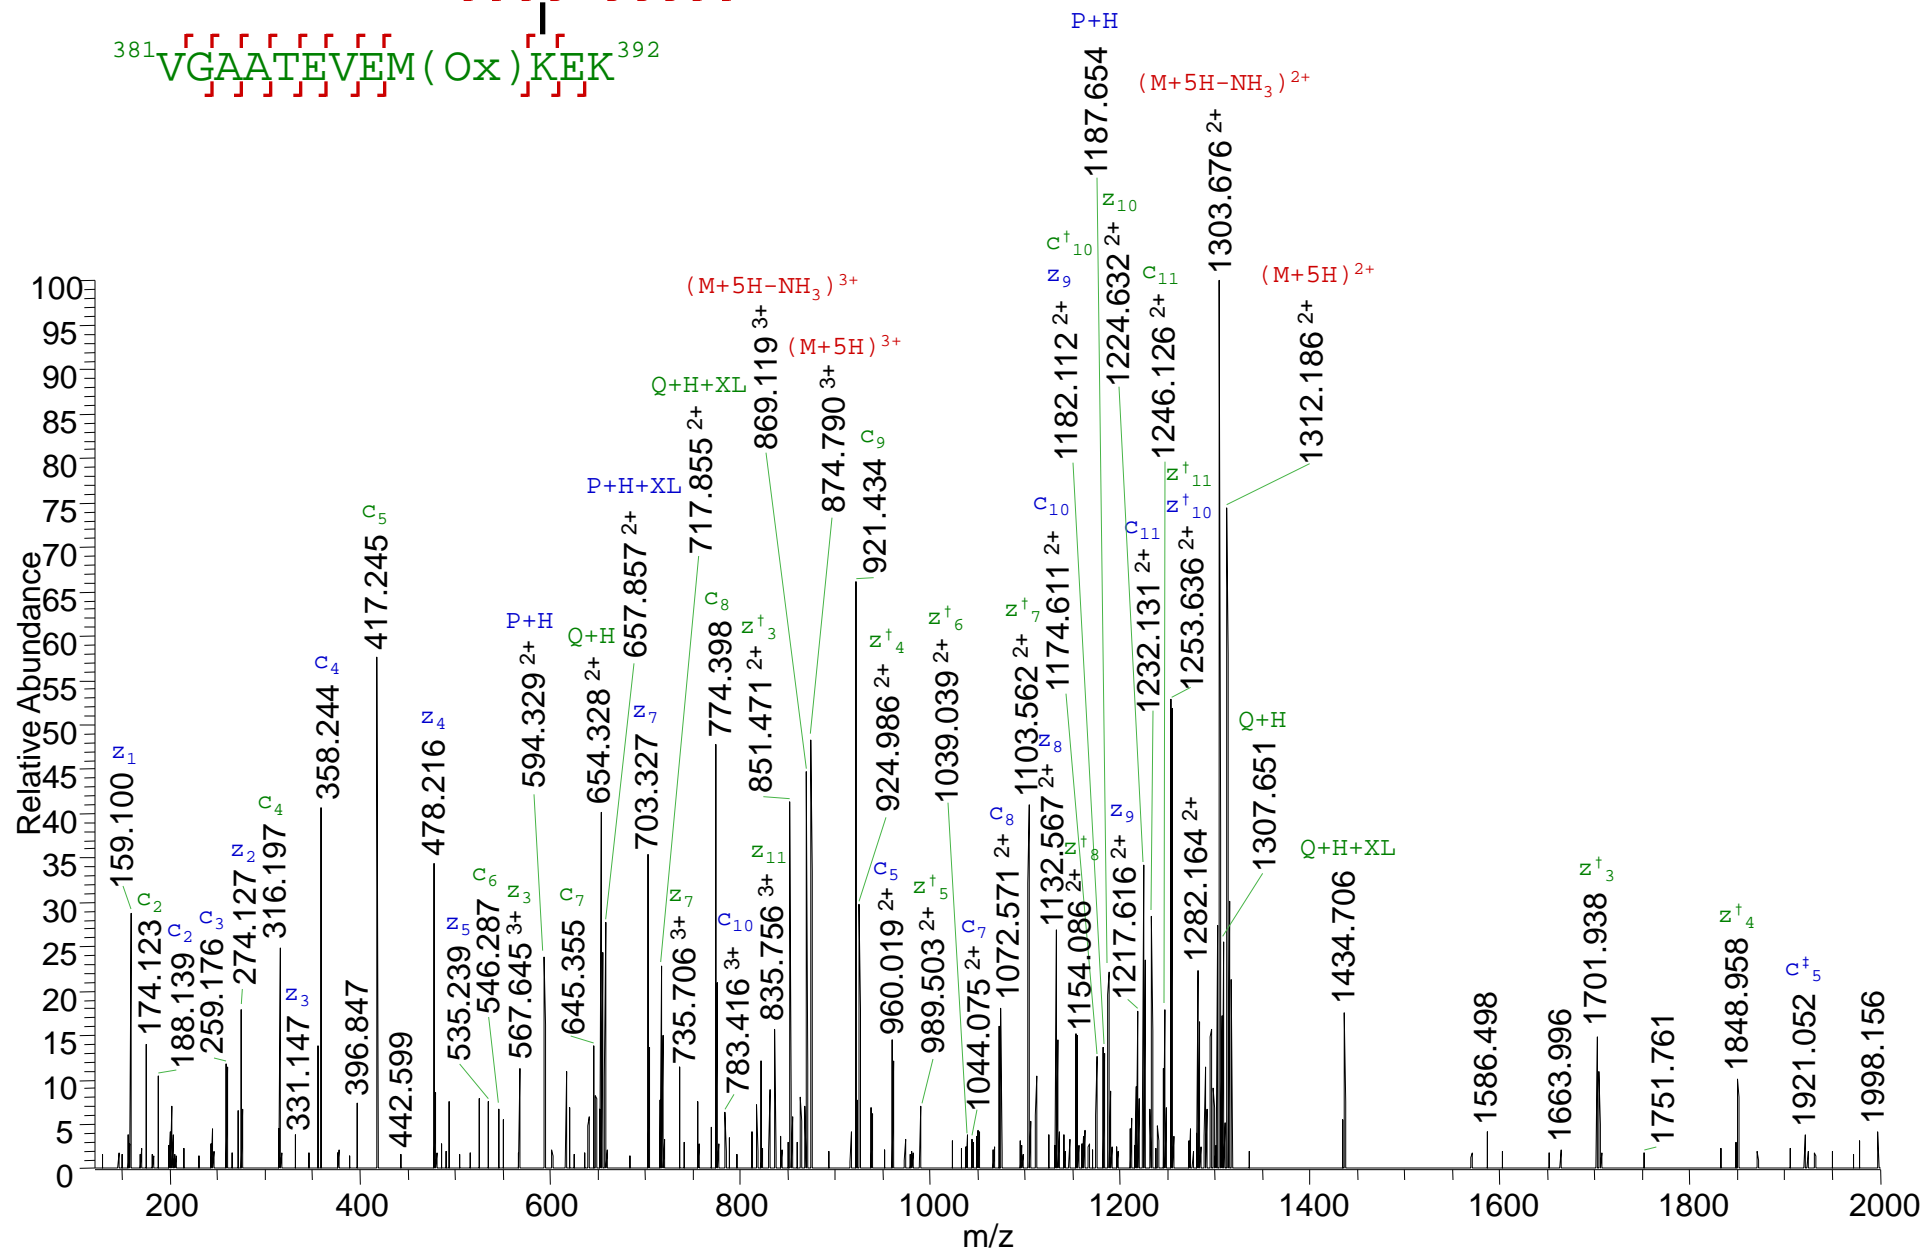

15)

prec: 666.1605<sup>5+</sup>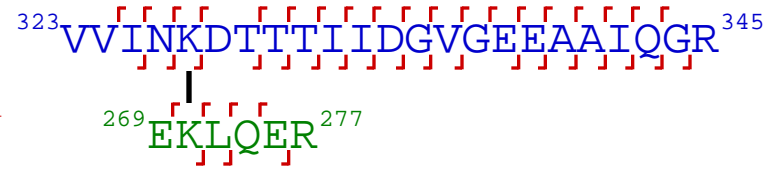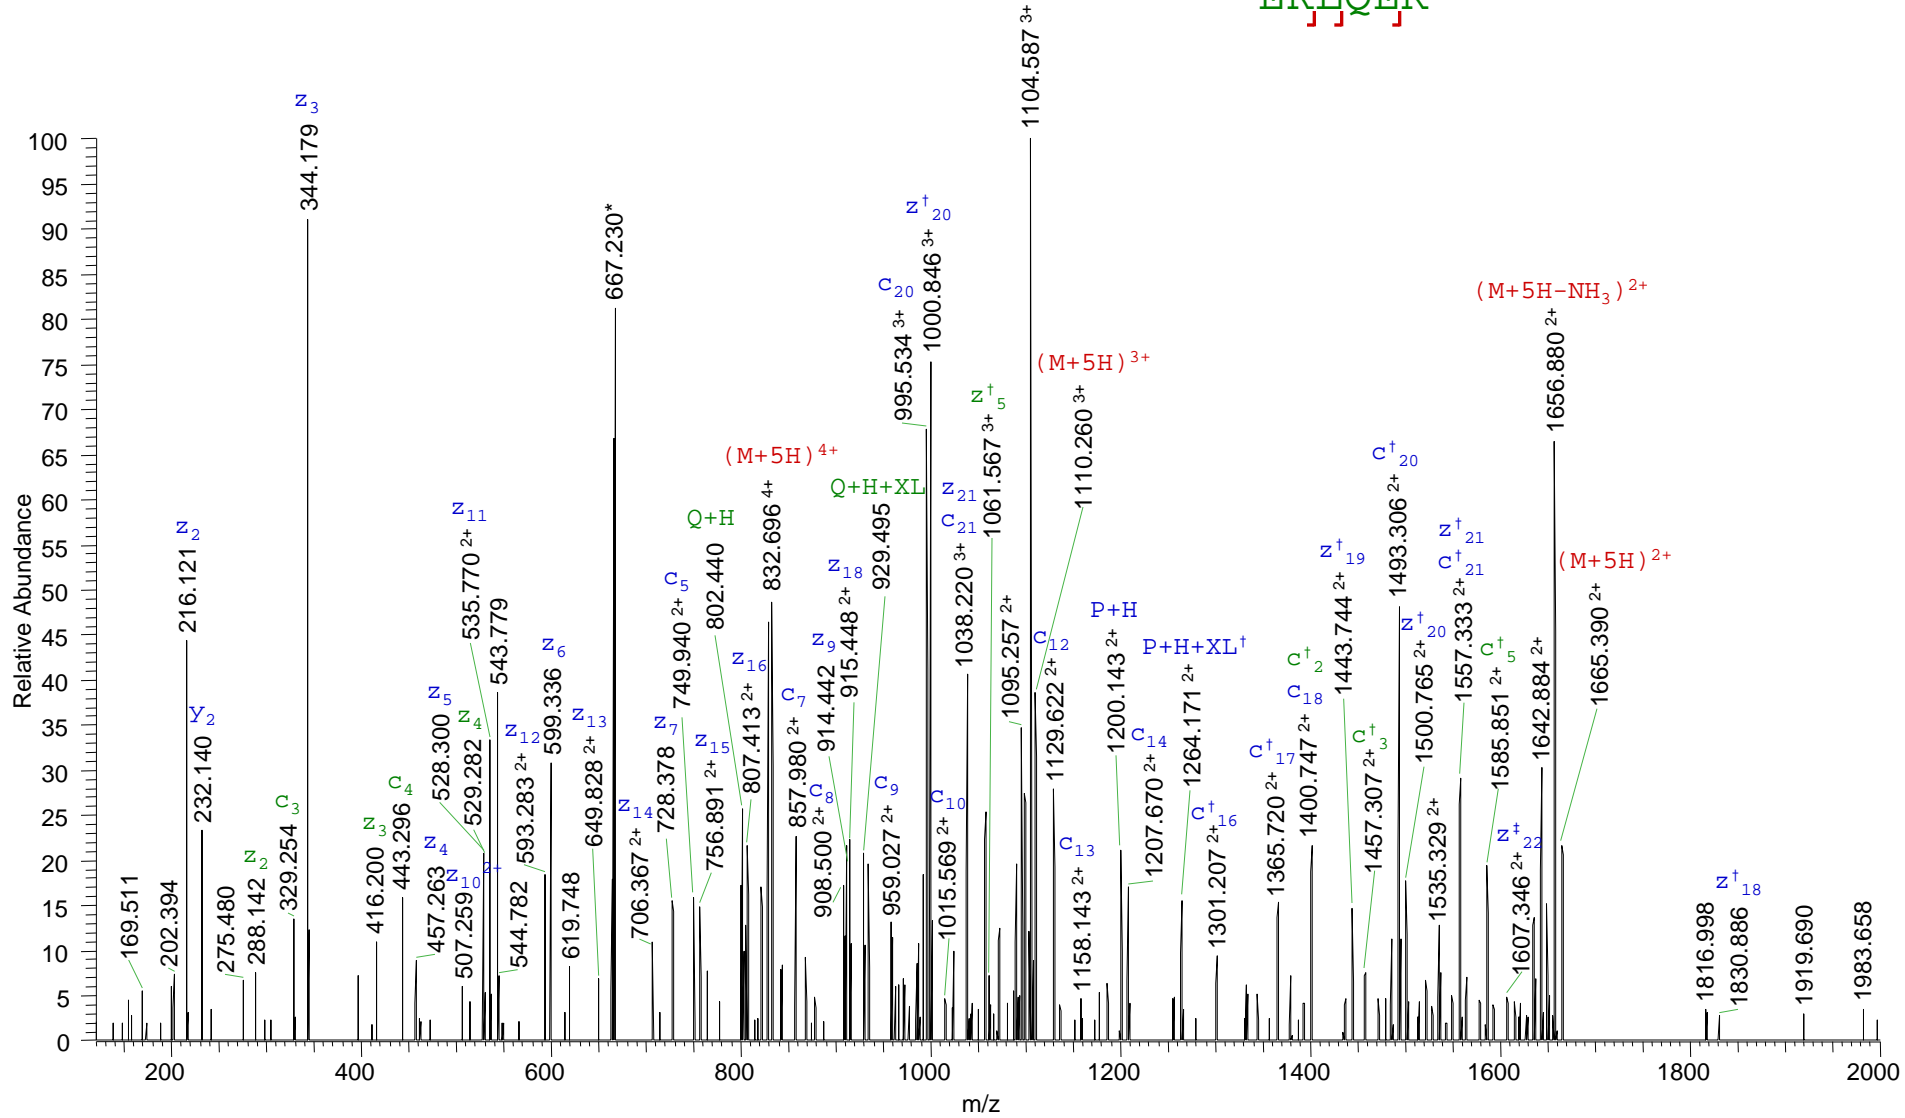



16)

prec: 582.3171<sup>6+</sup>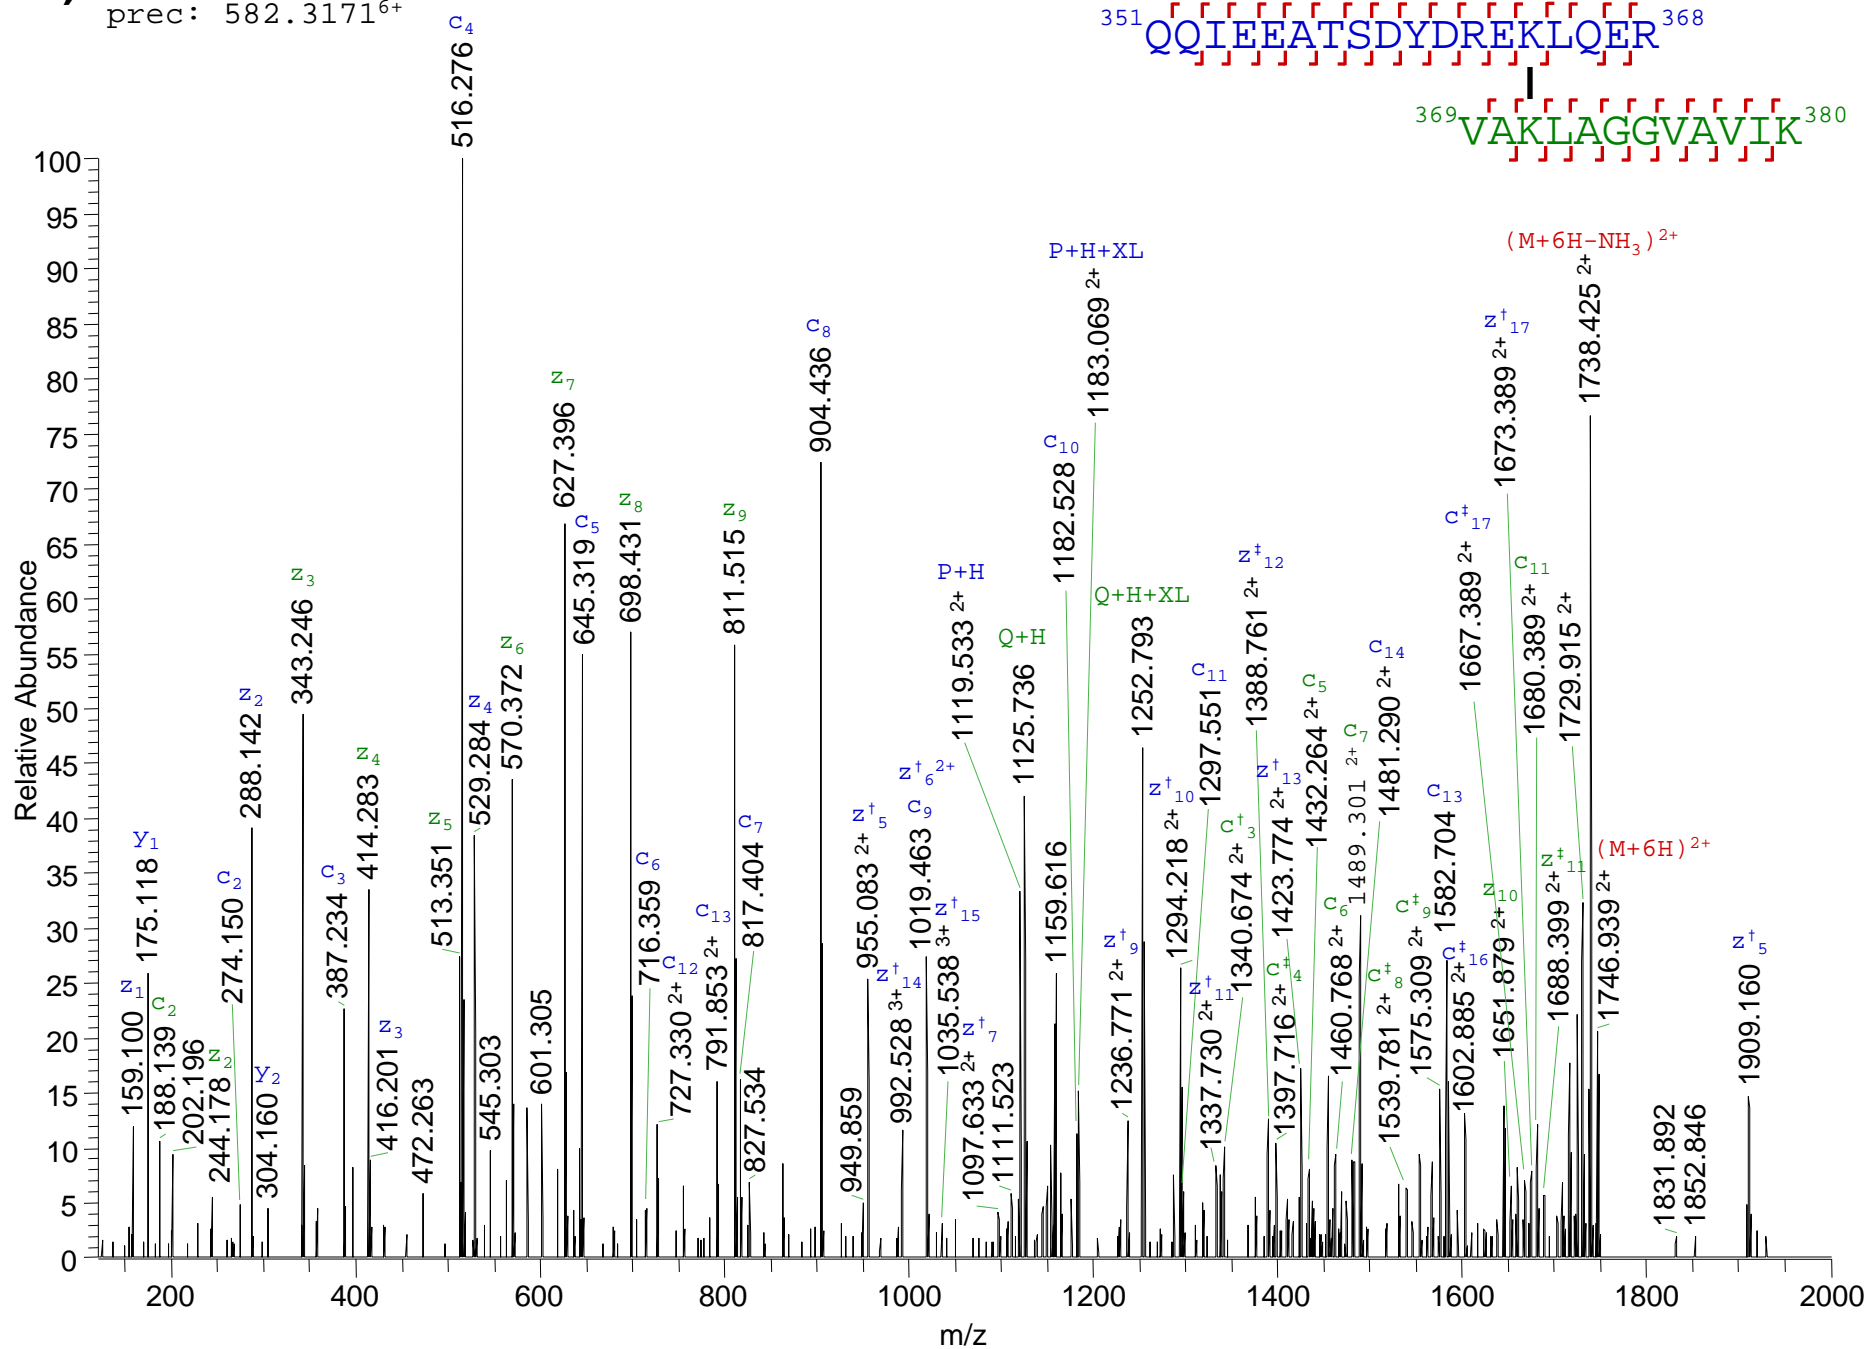

17)

prec: 382.2232<sup>5+</sup>

Q+H

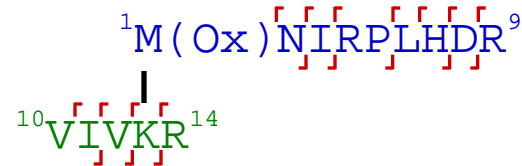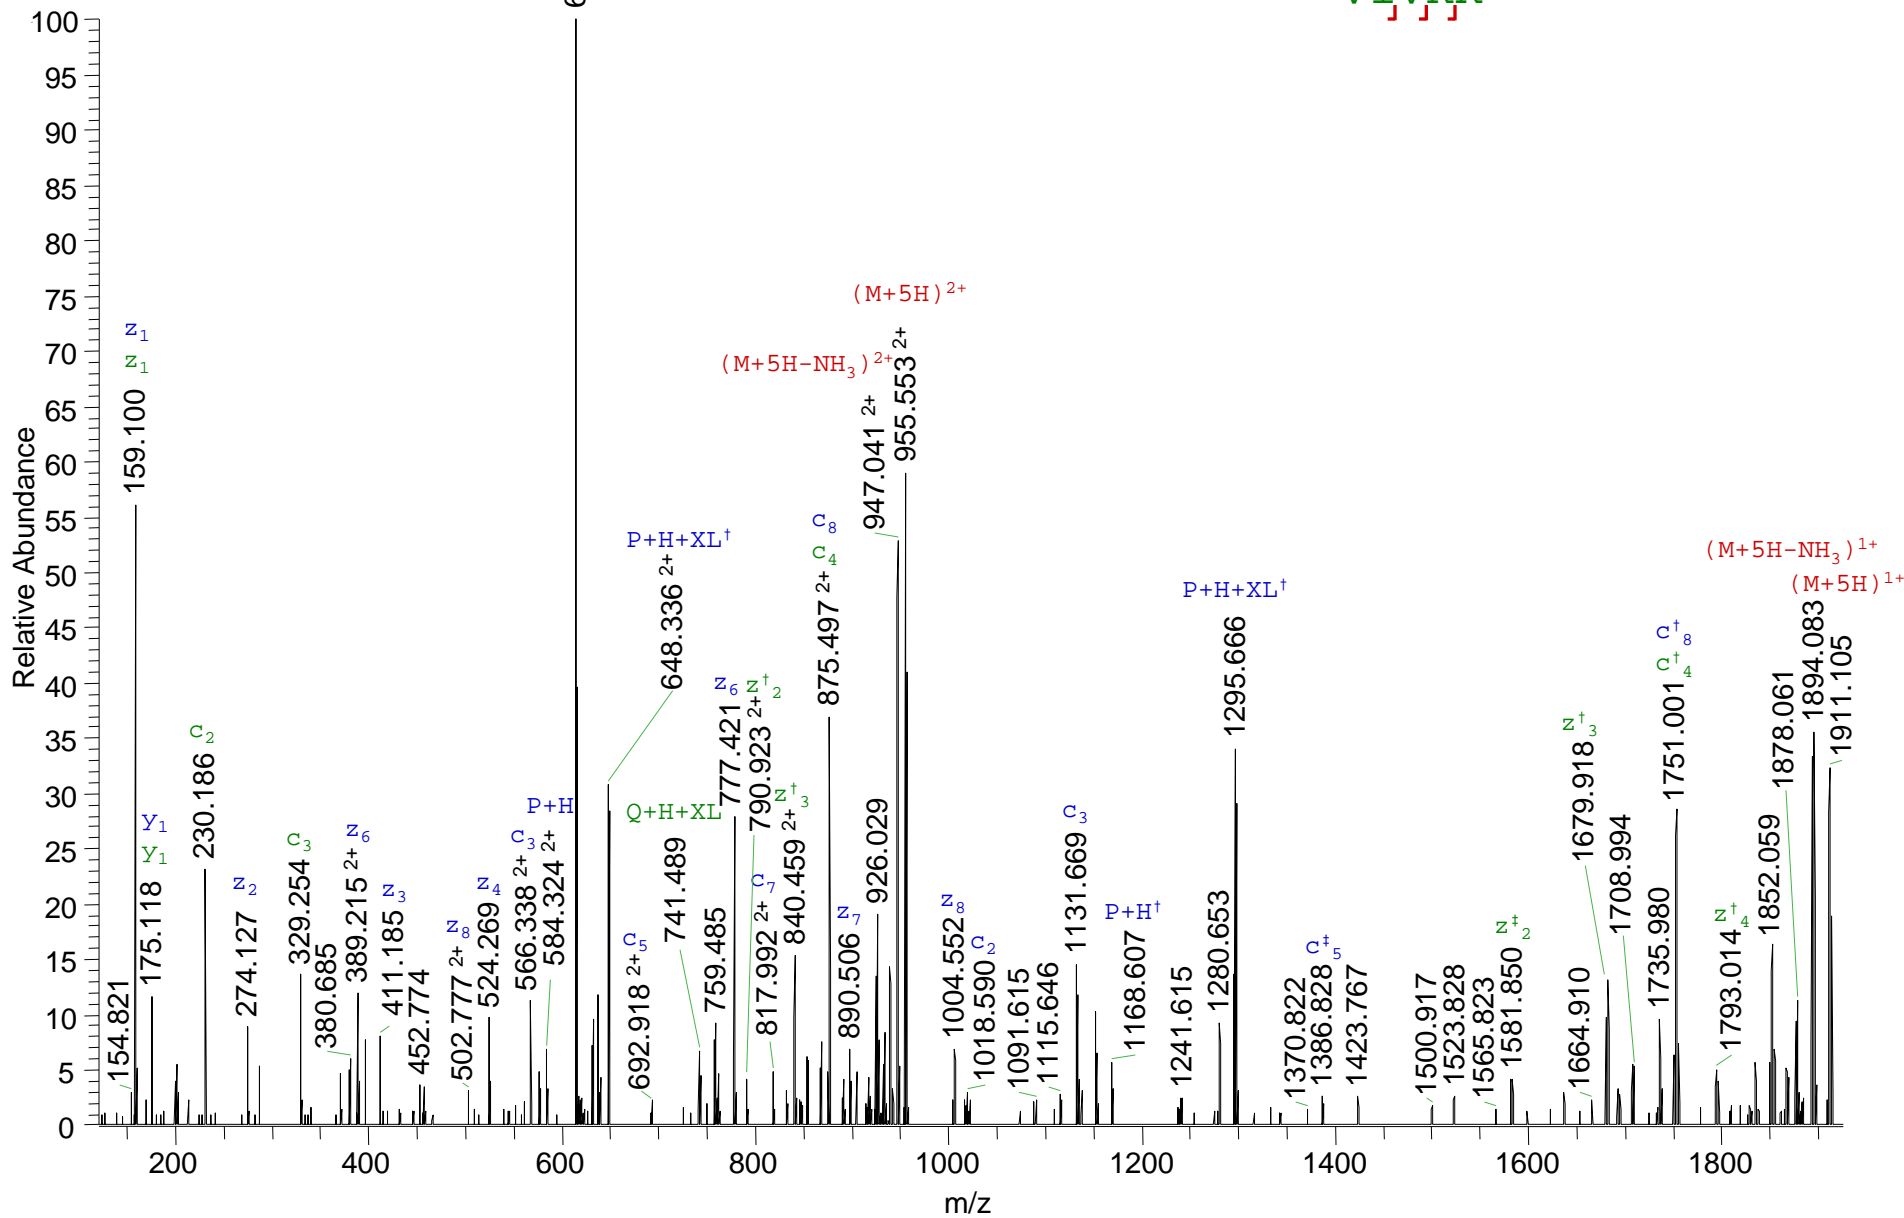

18)

prec: 406.0172<sup>5+6</sup>

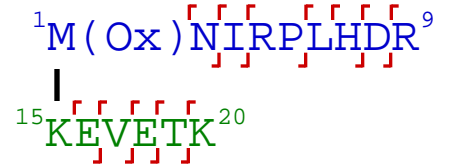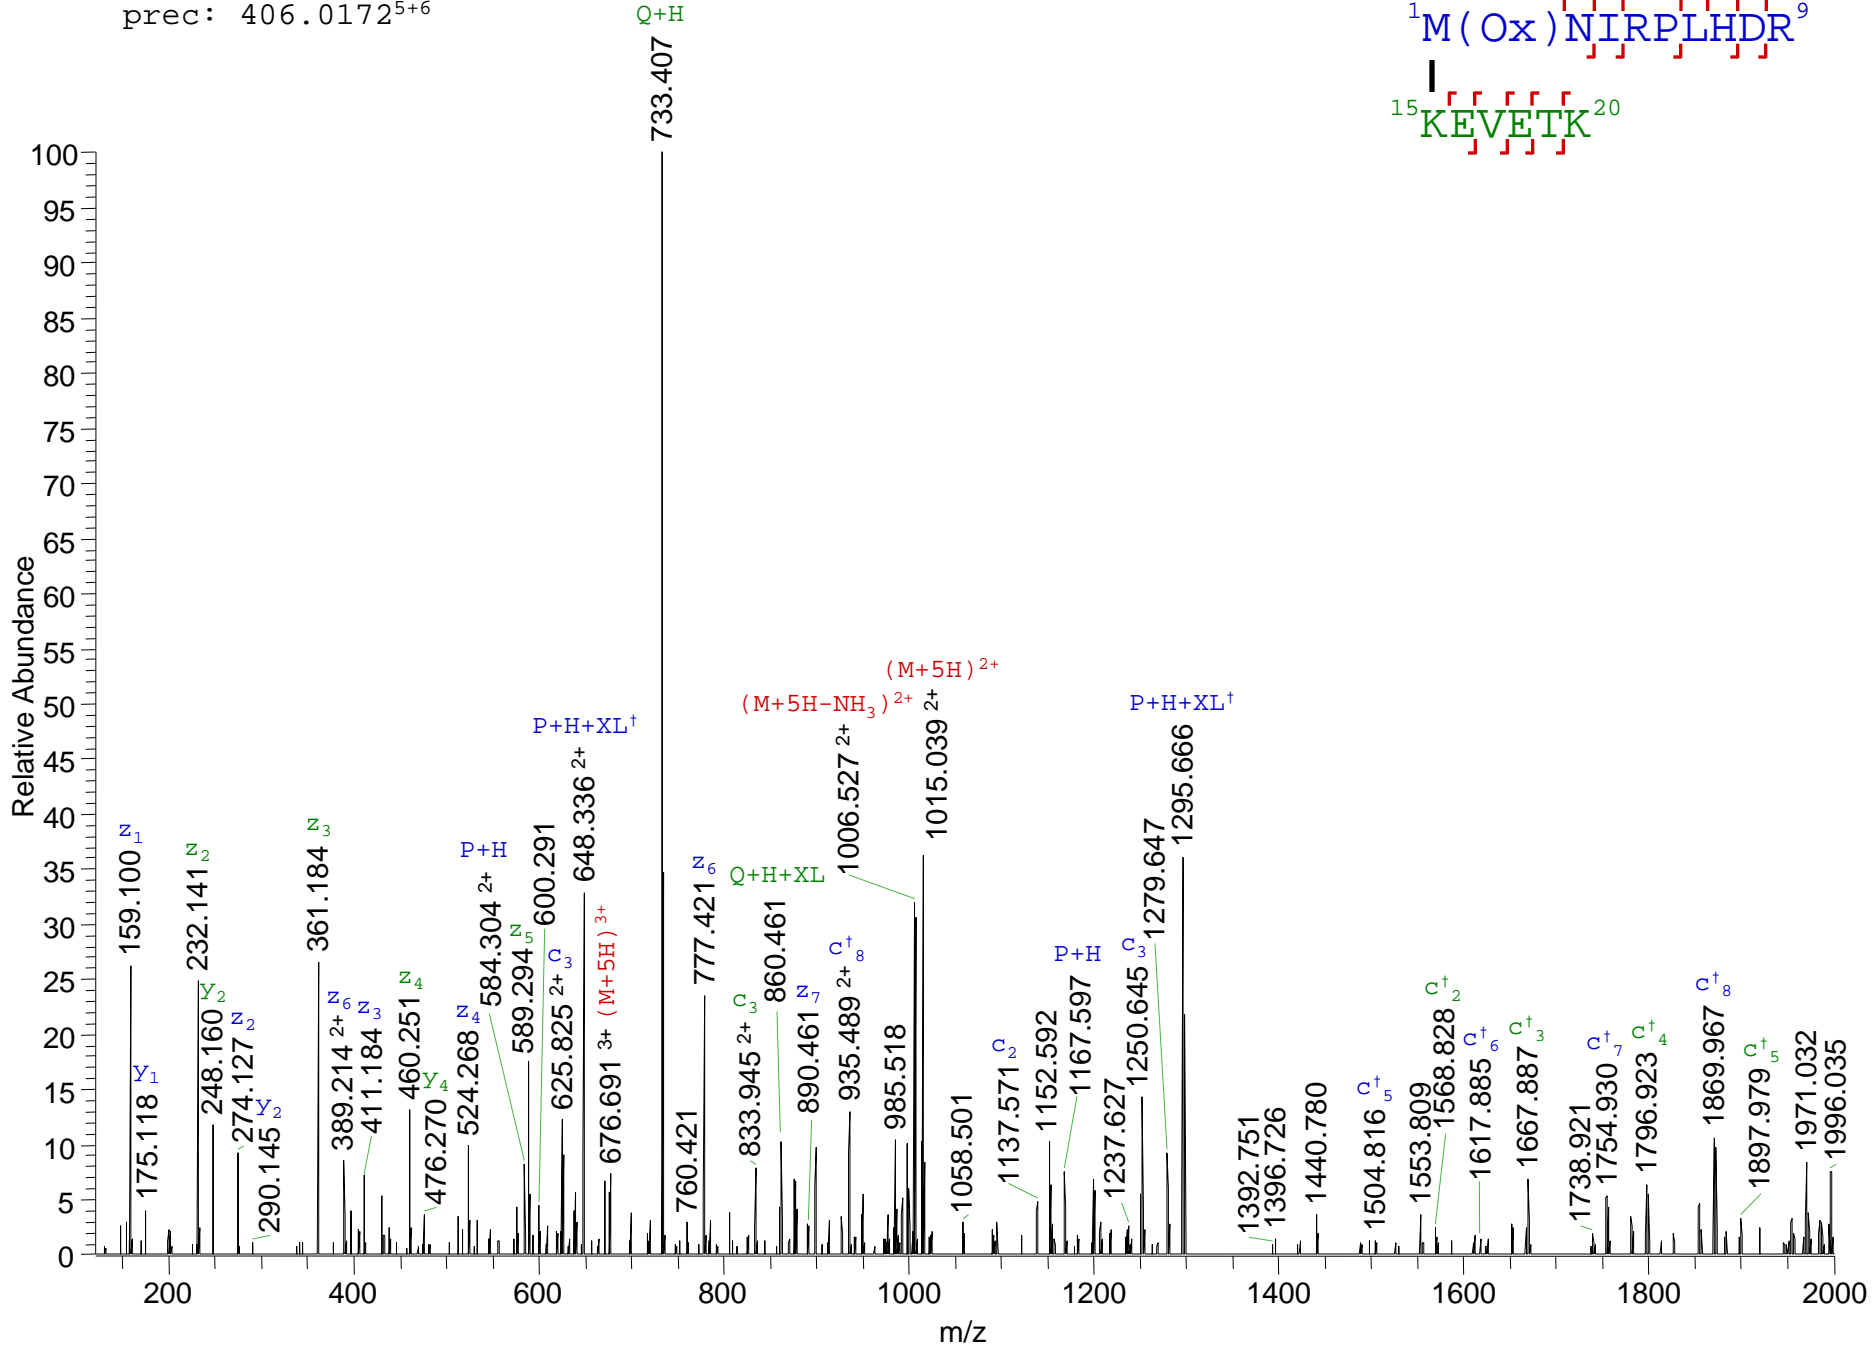

19)

prec: 613.9314<sup>5+</sup>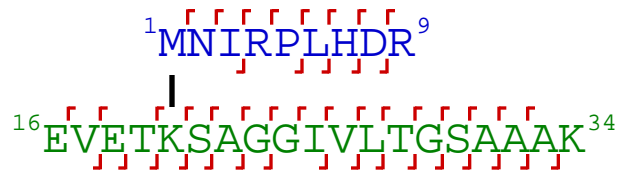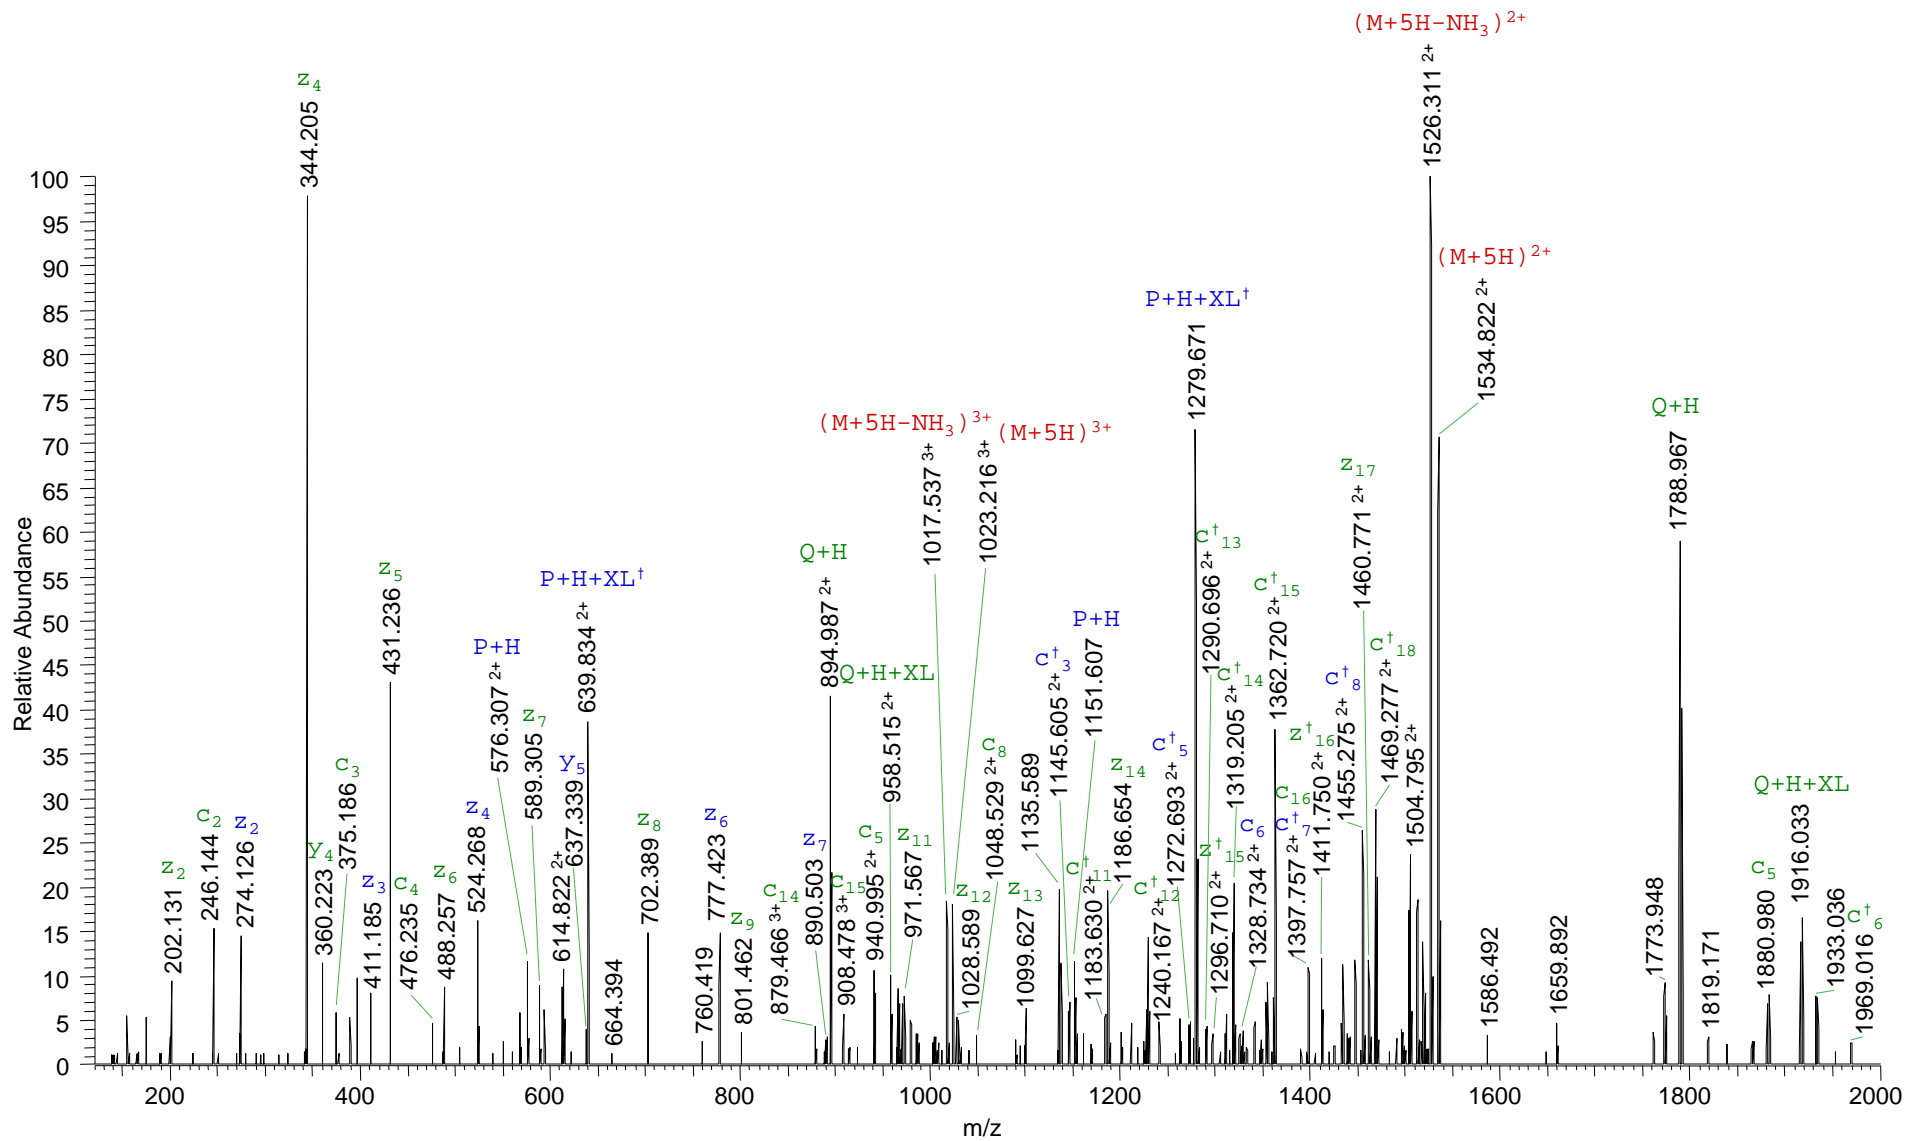

20)

 ${}^1\text{M}(\text{Ox})\text{NIRPLHDR}^9$ prec: 568.7086<sup>5+</sup> ${}^{21}\text{SAGGIVLTGSAAAKSTR}^{37}$ 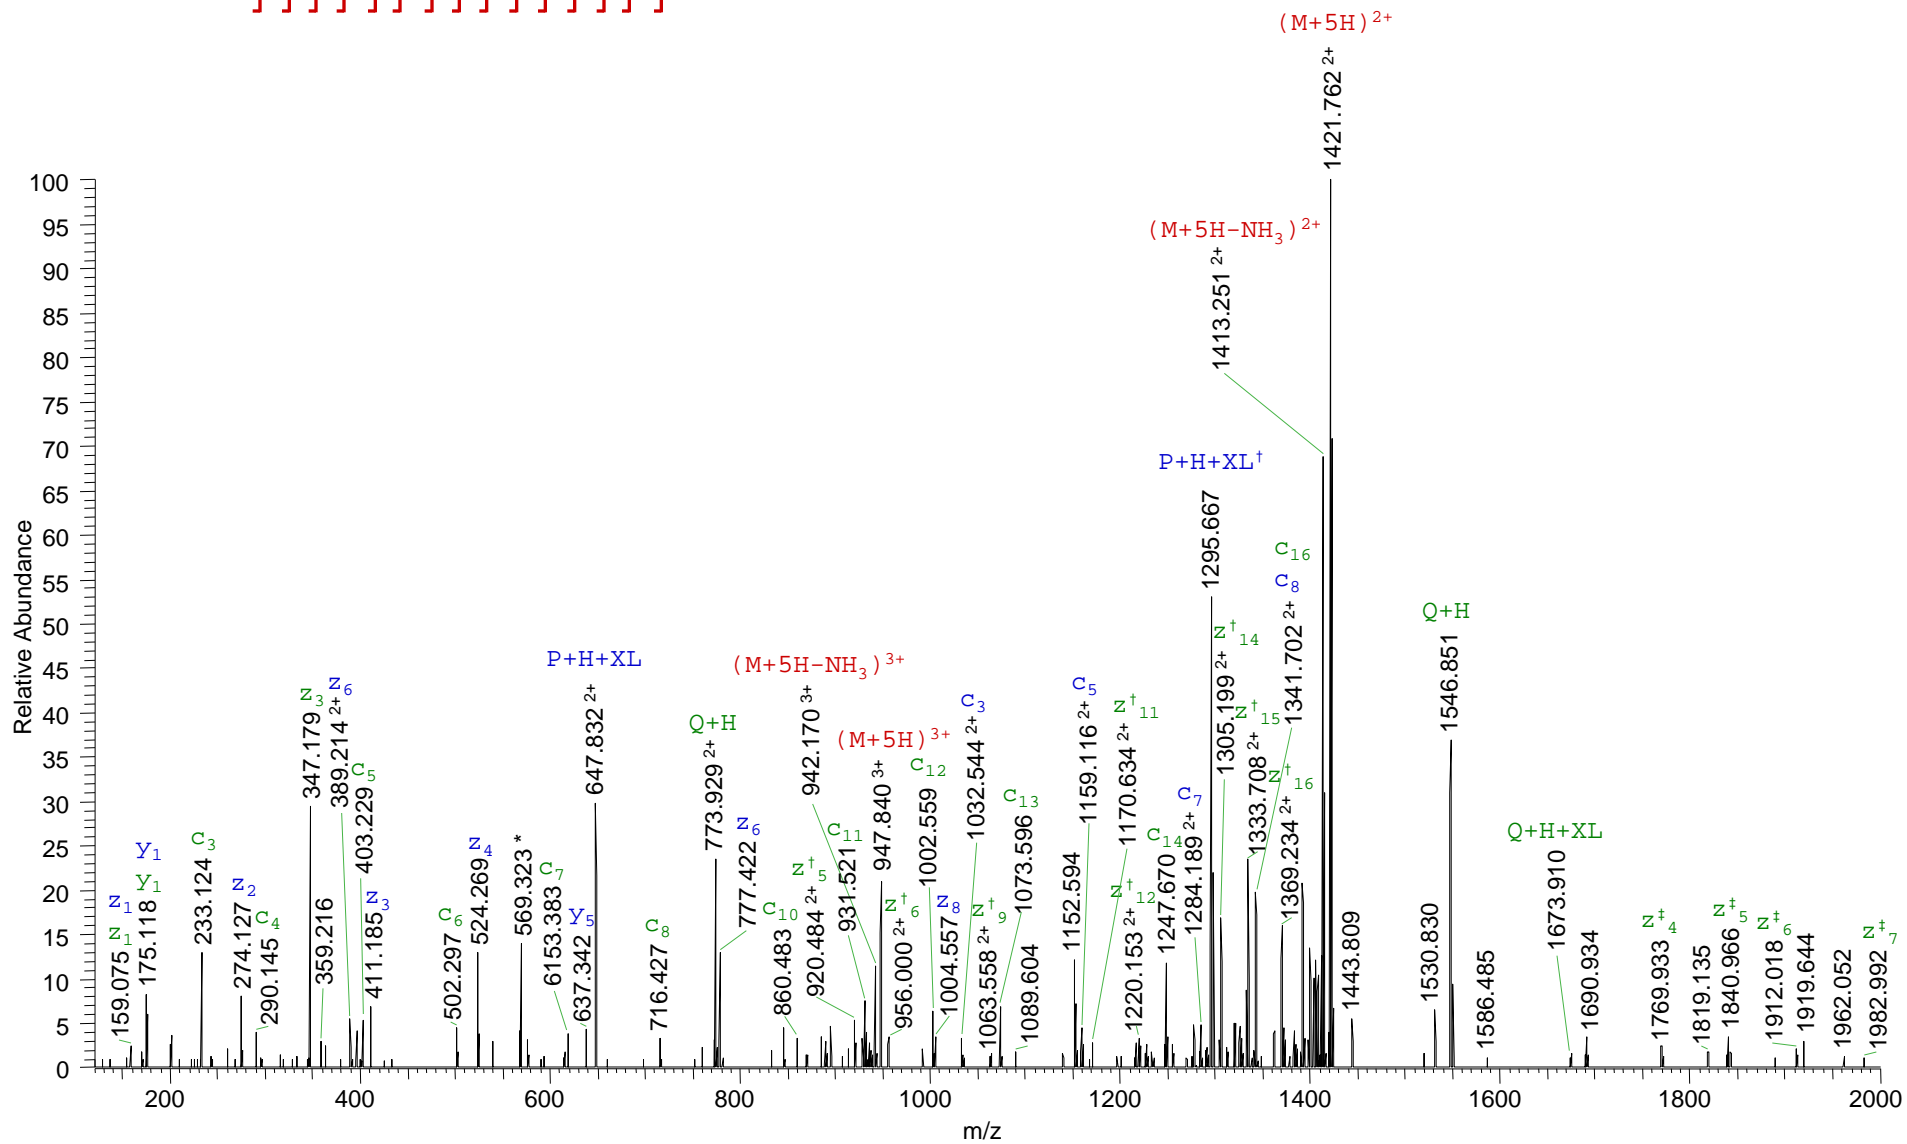

21)

prec: 368.9760<sup>4+</sup>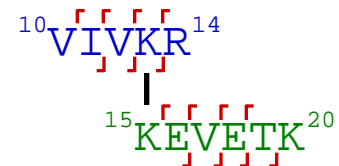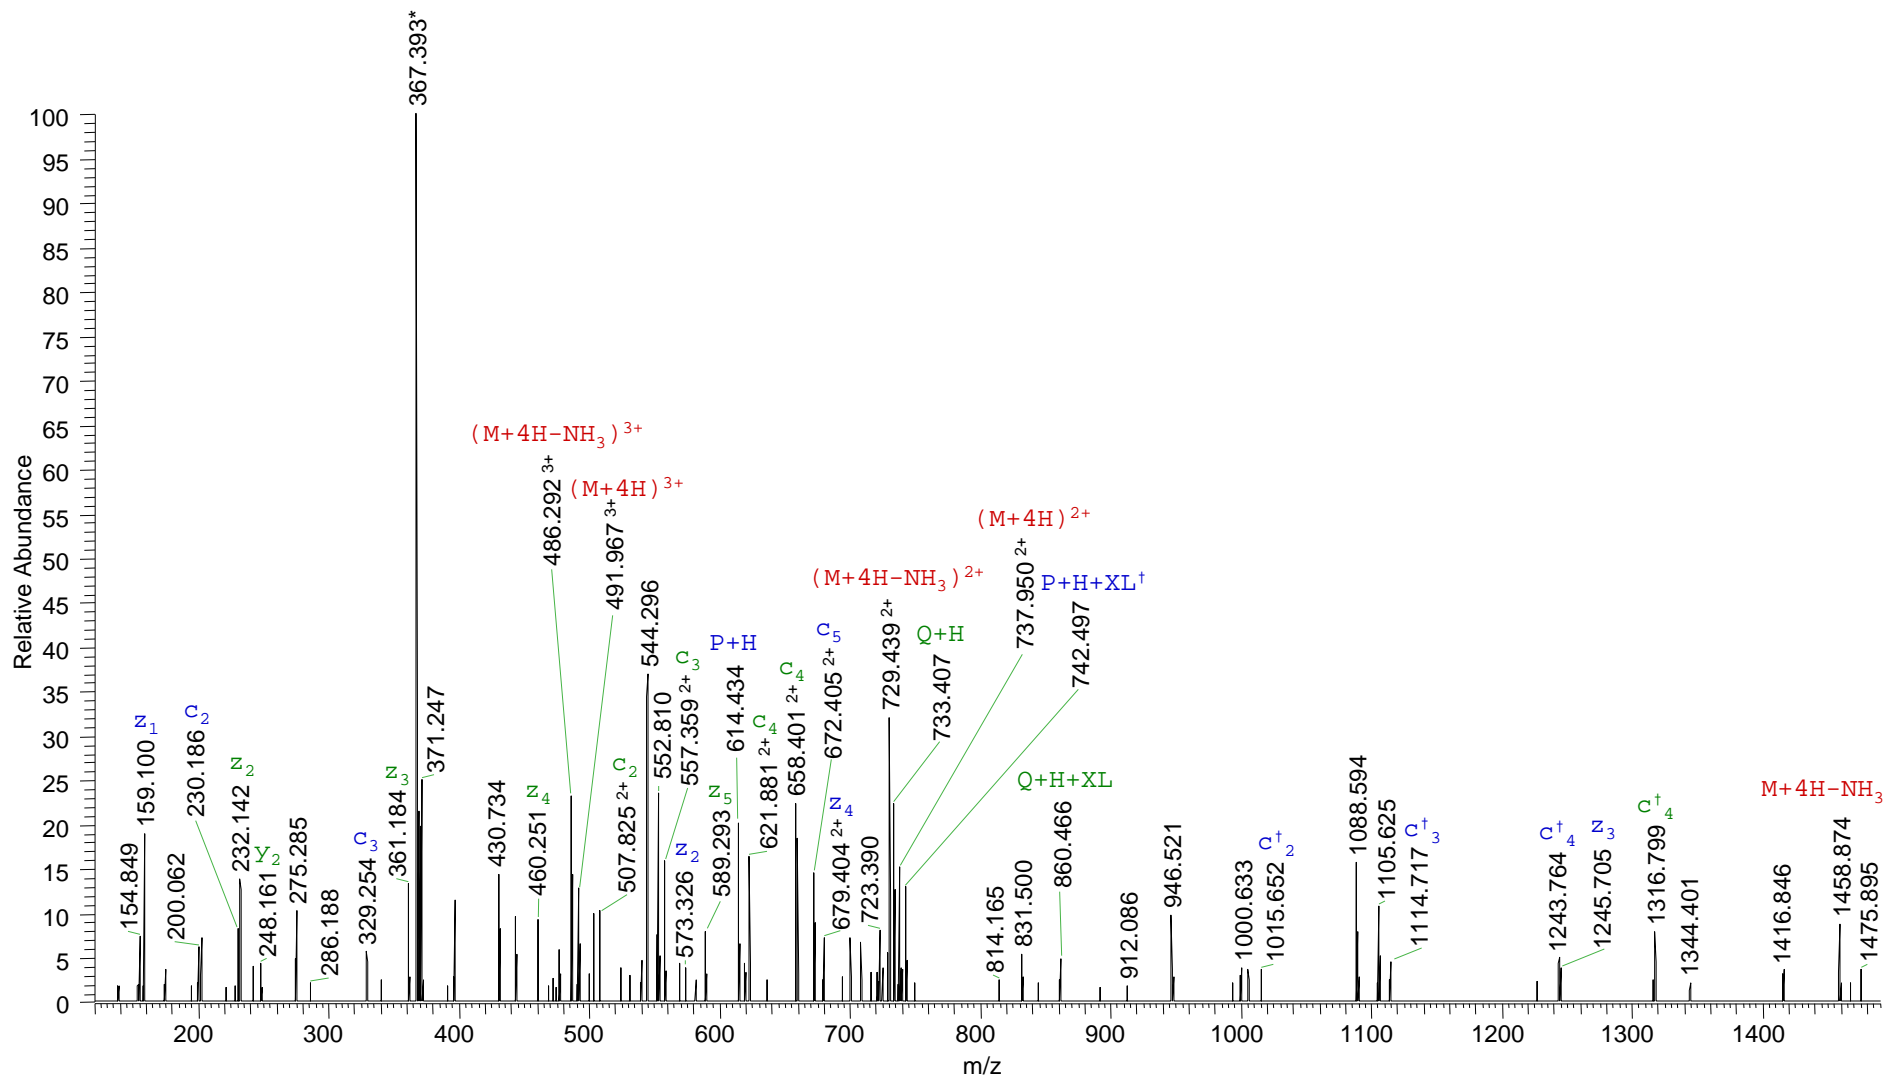

22)

prec: 506.4958<sup>5+</sup>

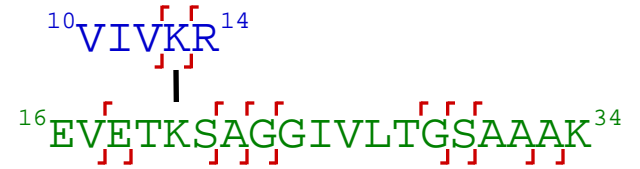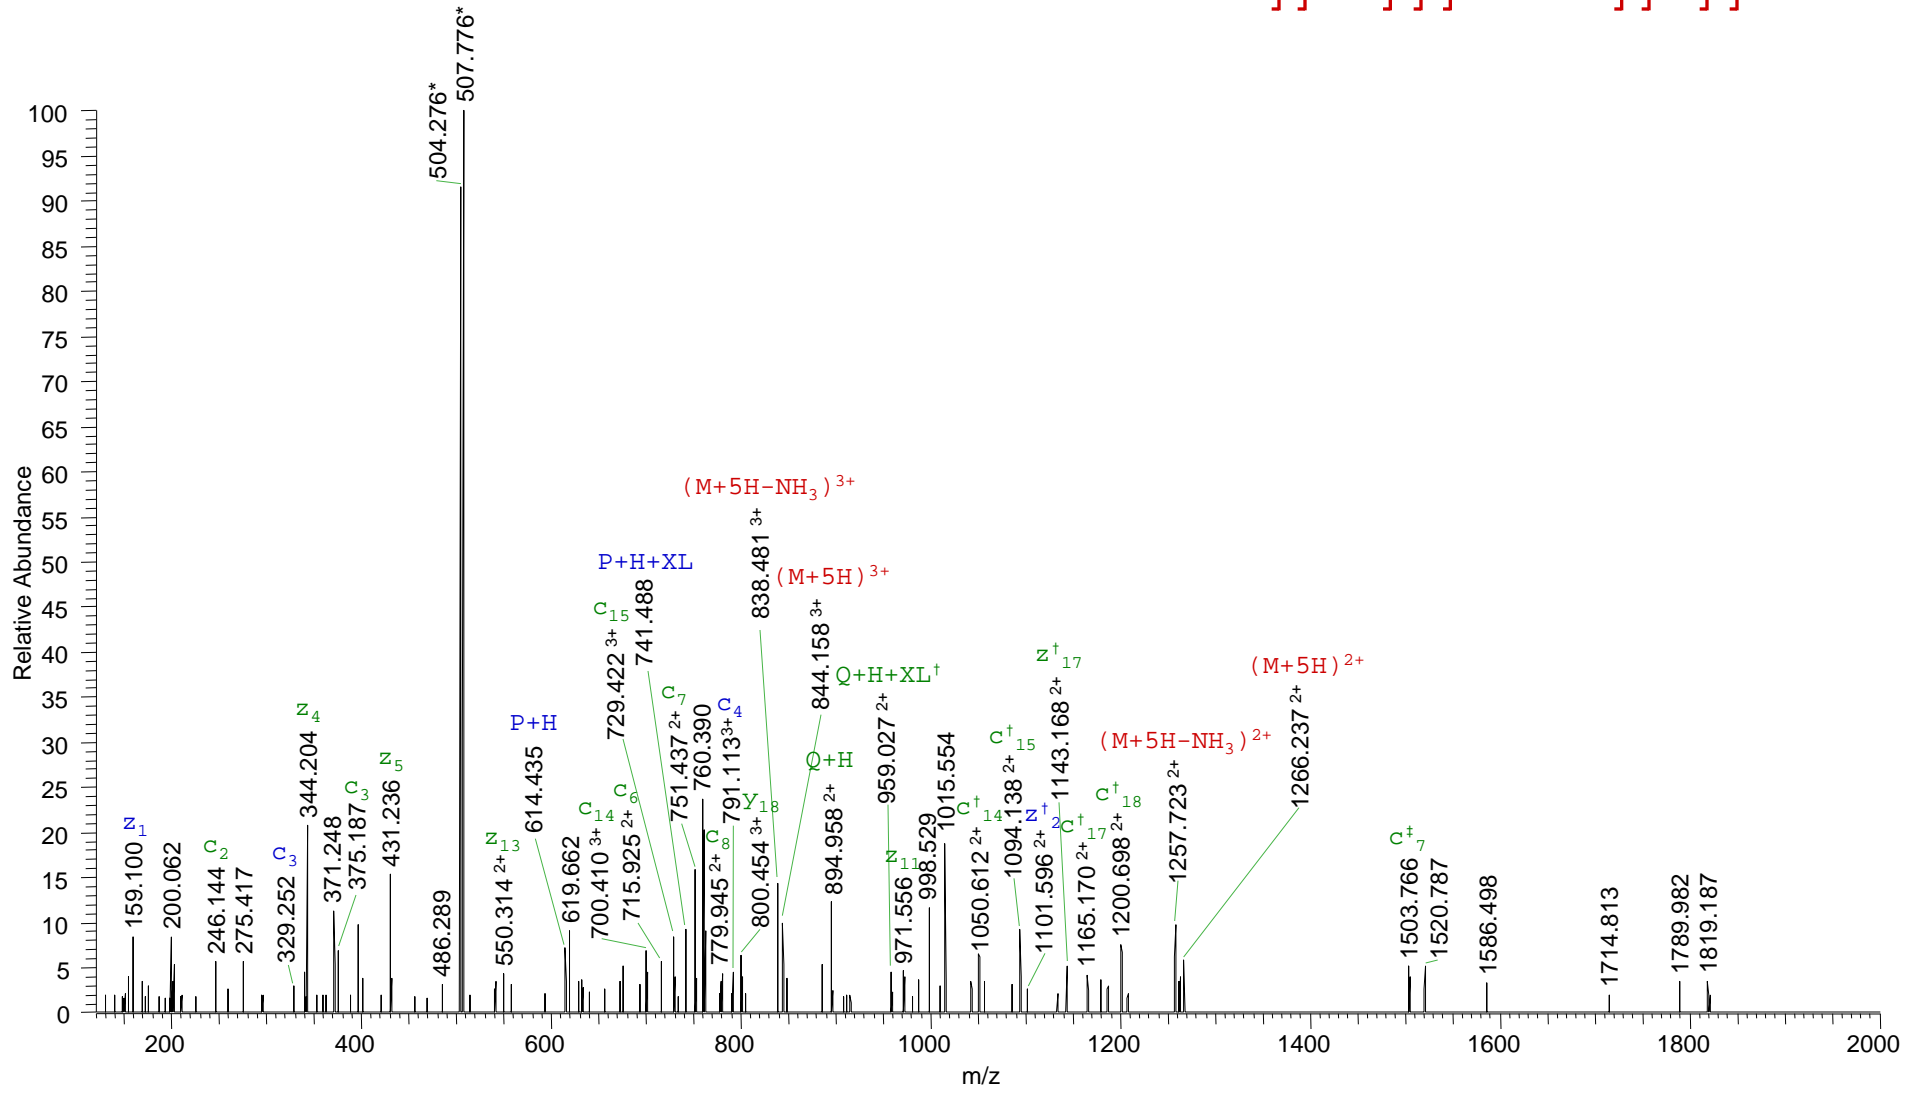

23)

prec: 572.3381<sup>4+</sup>

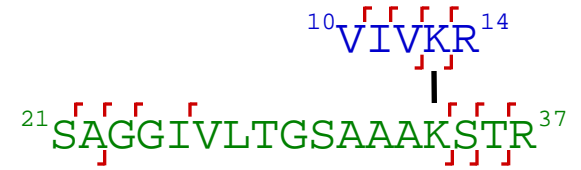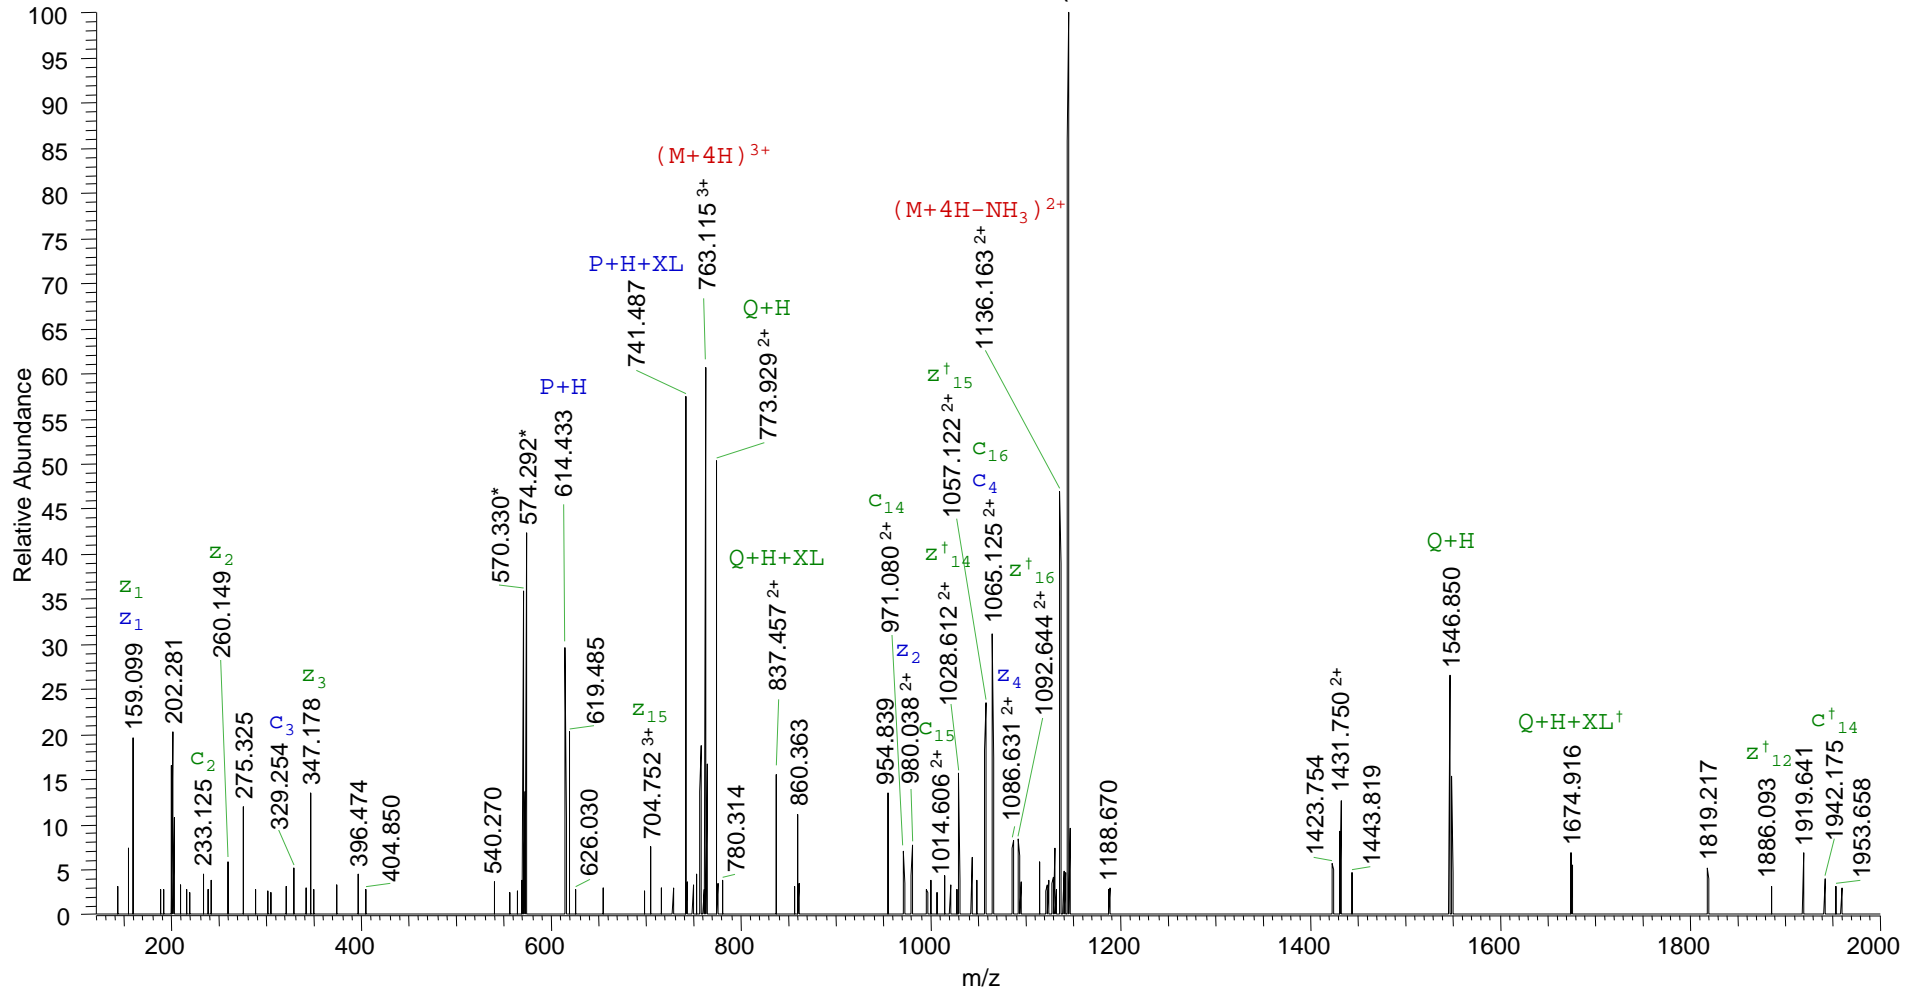



24)

prec: 513.0867<sup>5+6</sup>

<sup>14</sup>RKEVETK<sup>20</sup>

<sup>21</sup>SAGGIVLTGSAAAKSTR<sup>37</sup>

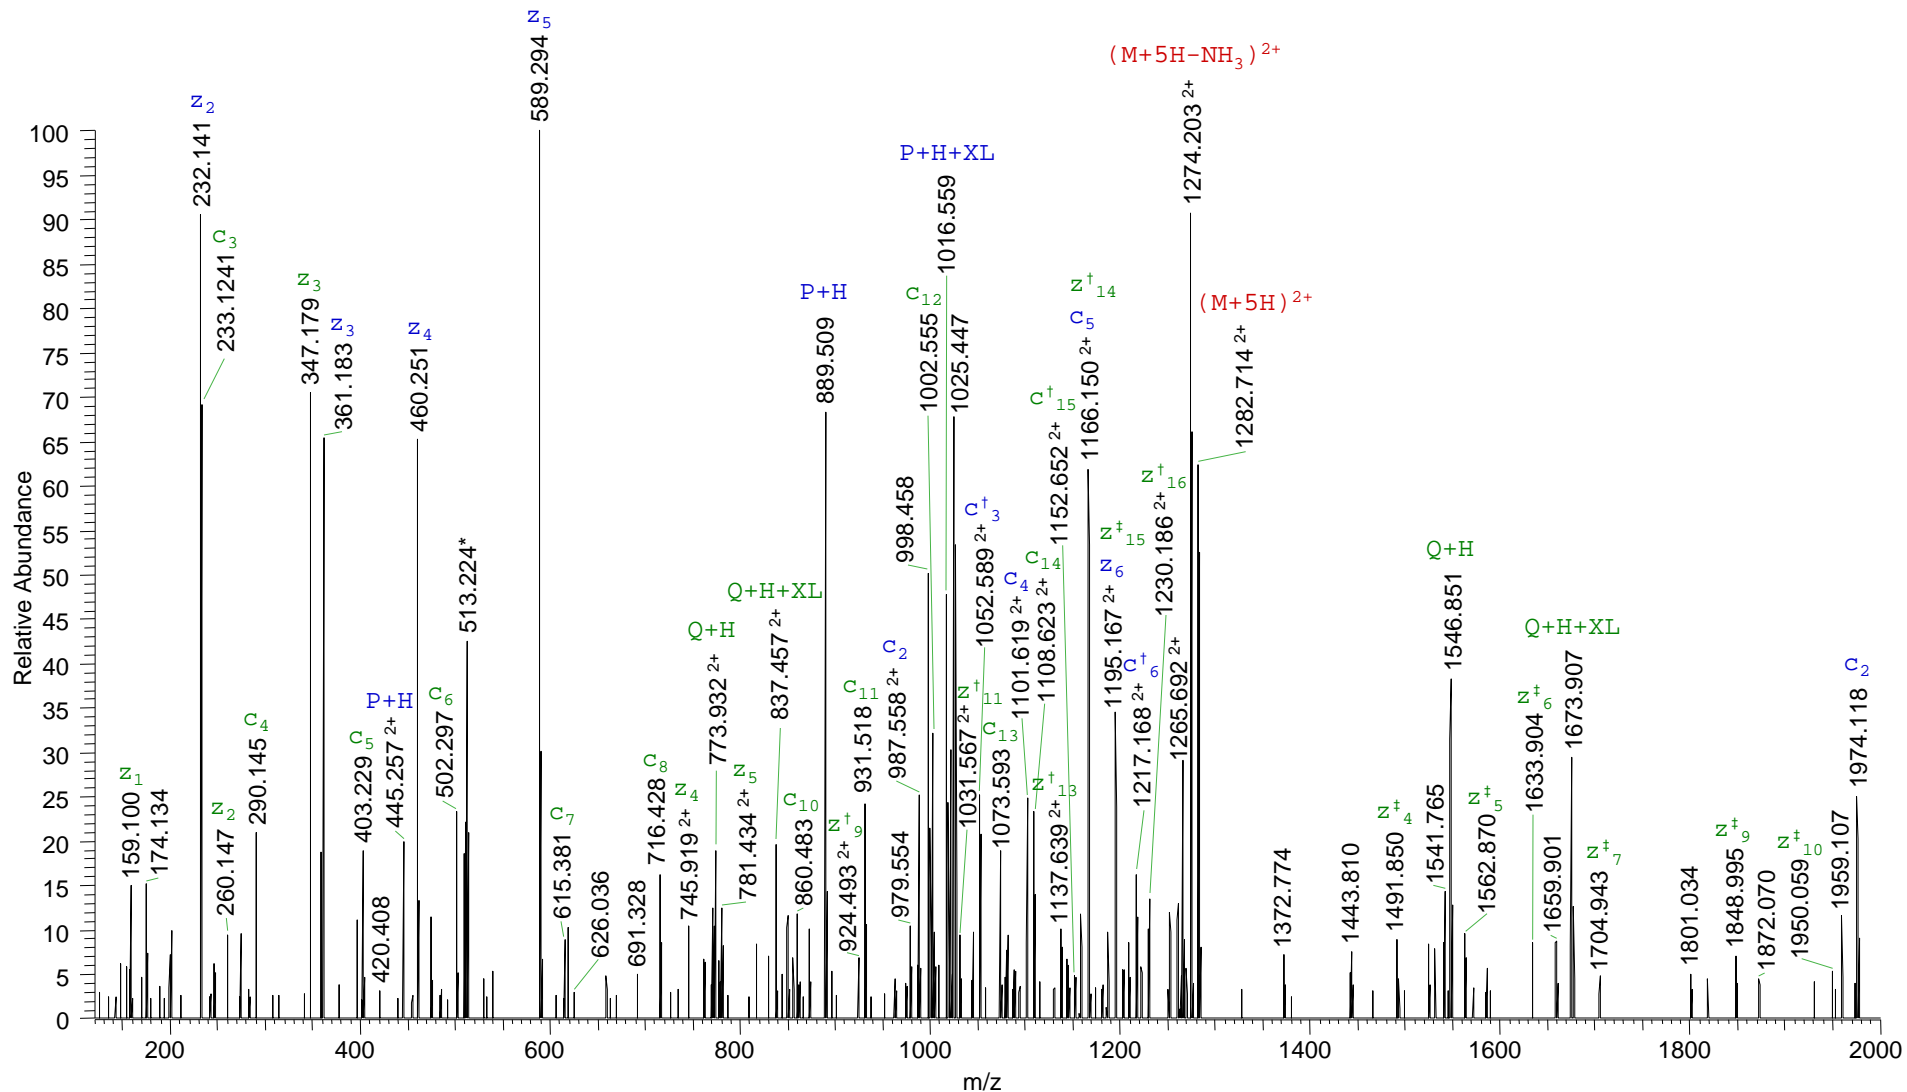

25)

prec: 703.1783<sup>5+</sup>

(M+5H)<sup>3+</sup>

<sup>21</sup>SAGGIVLTGSAAAKSTR<sup>37</sup>  
<sup>61</sup>VGDIVIFNDGYGVKSEK<sup>77</sup>

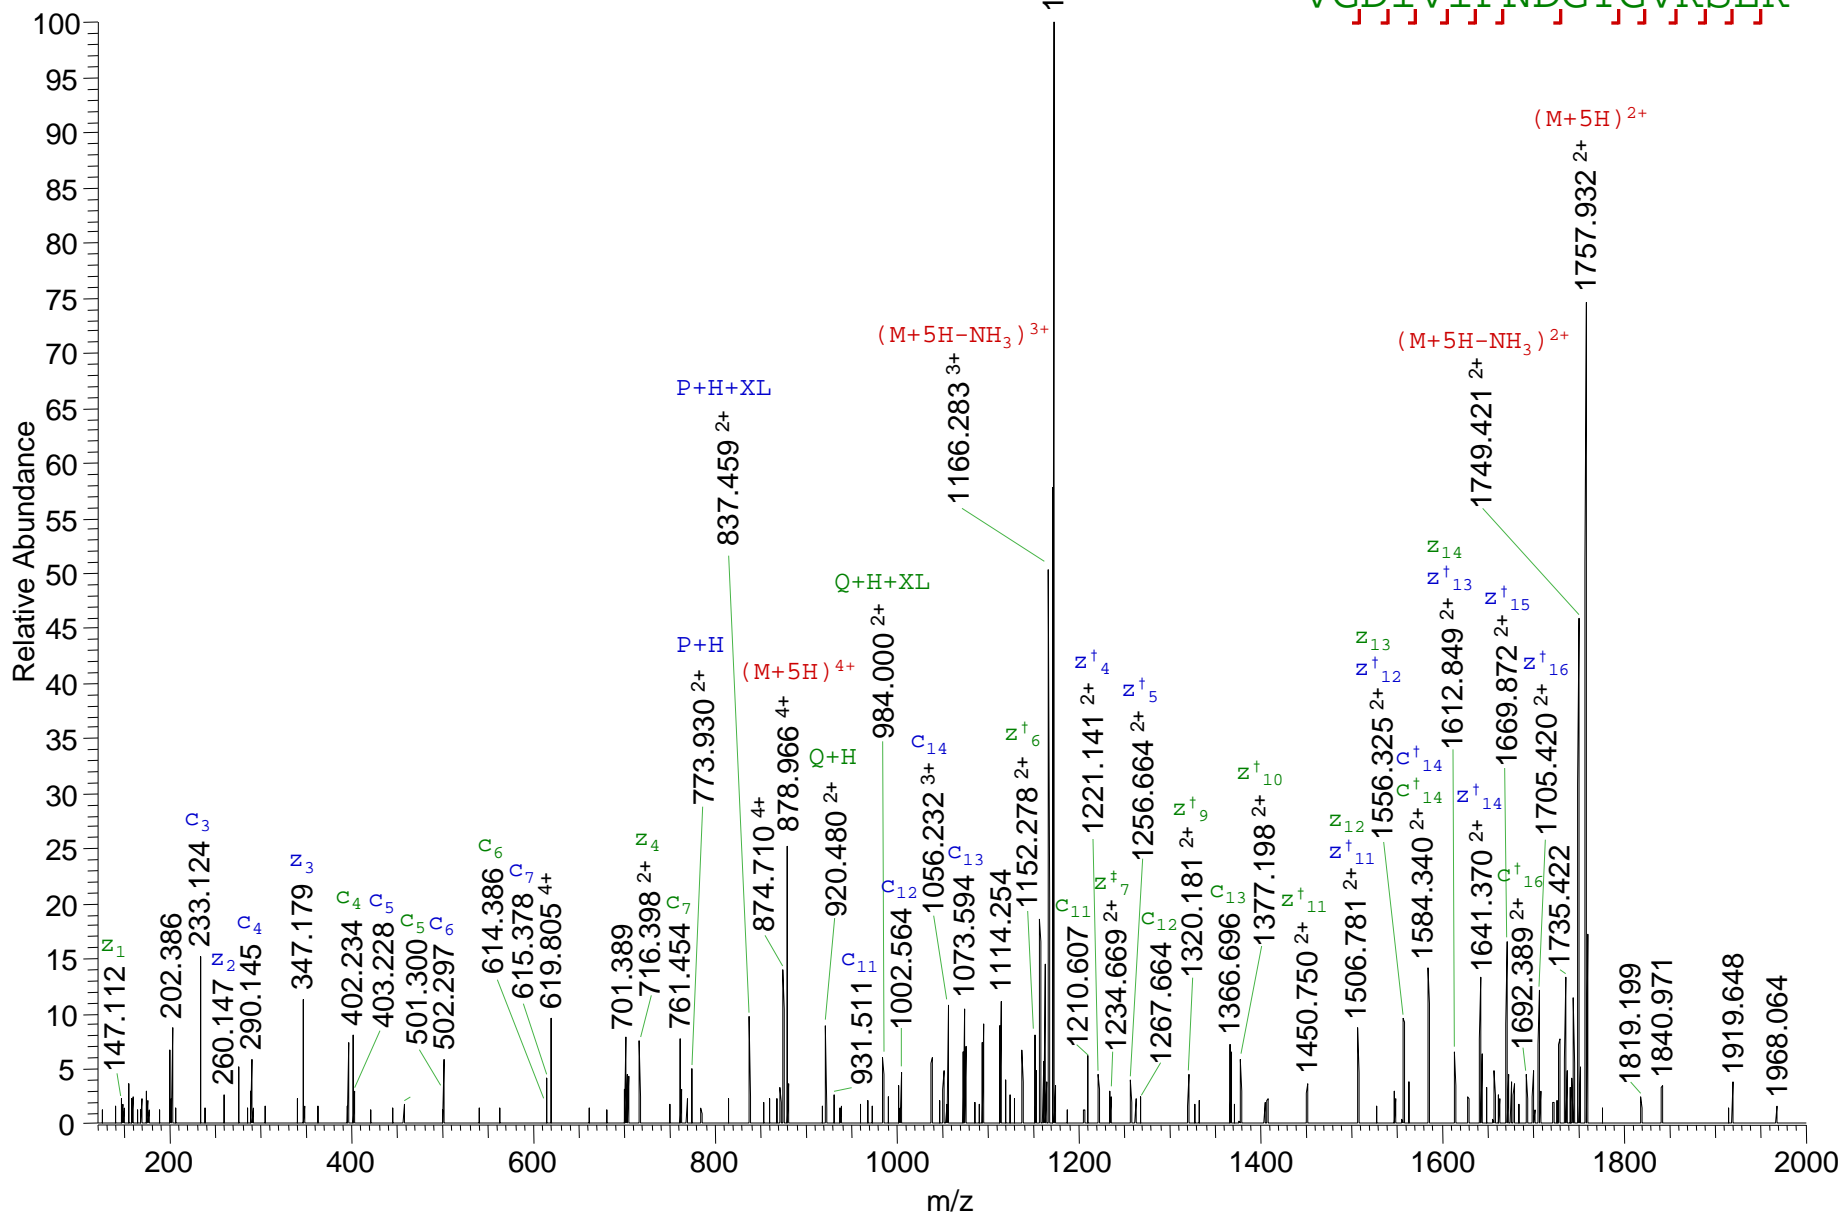

Supplement: supp_M110.003764_mcp.M110.003764-2.pdf [file supp_M110.003764_mcp.M110.003764-2.pdf]
