# Supplementary material
Source: PubMed Central journal article supplement (PMC2953922)

## Precursor Charge of Crosslinked Peptides

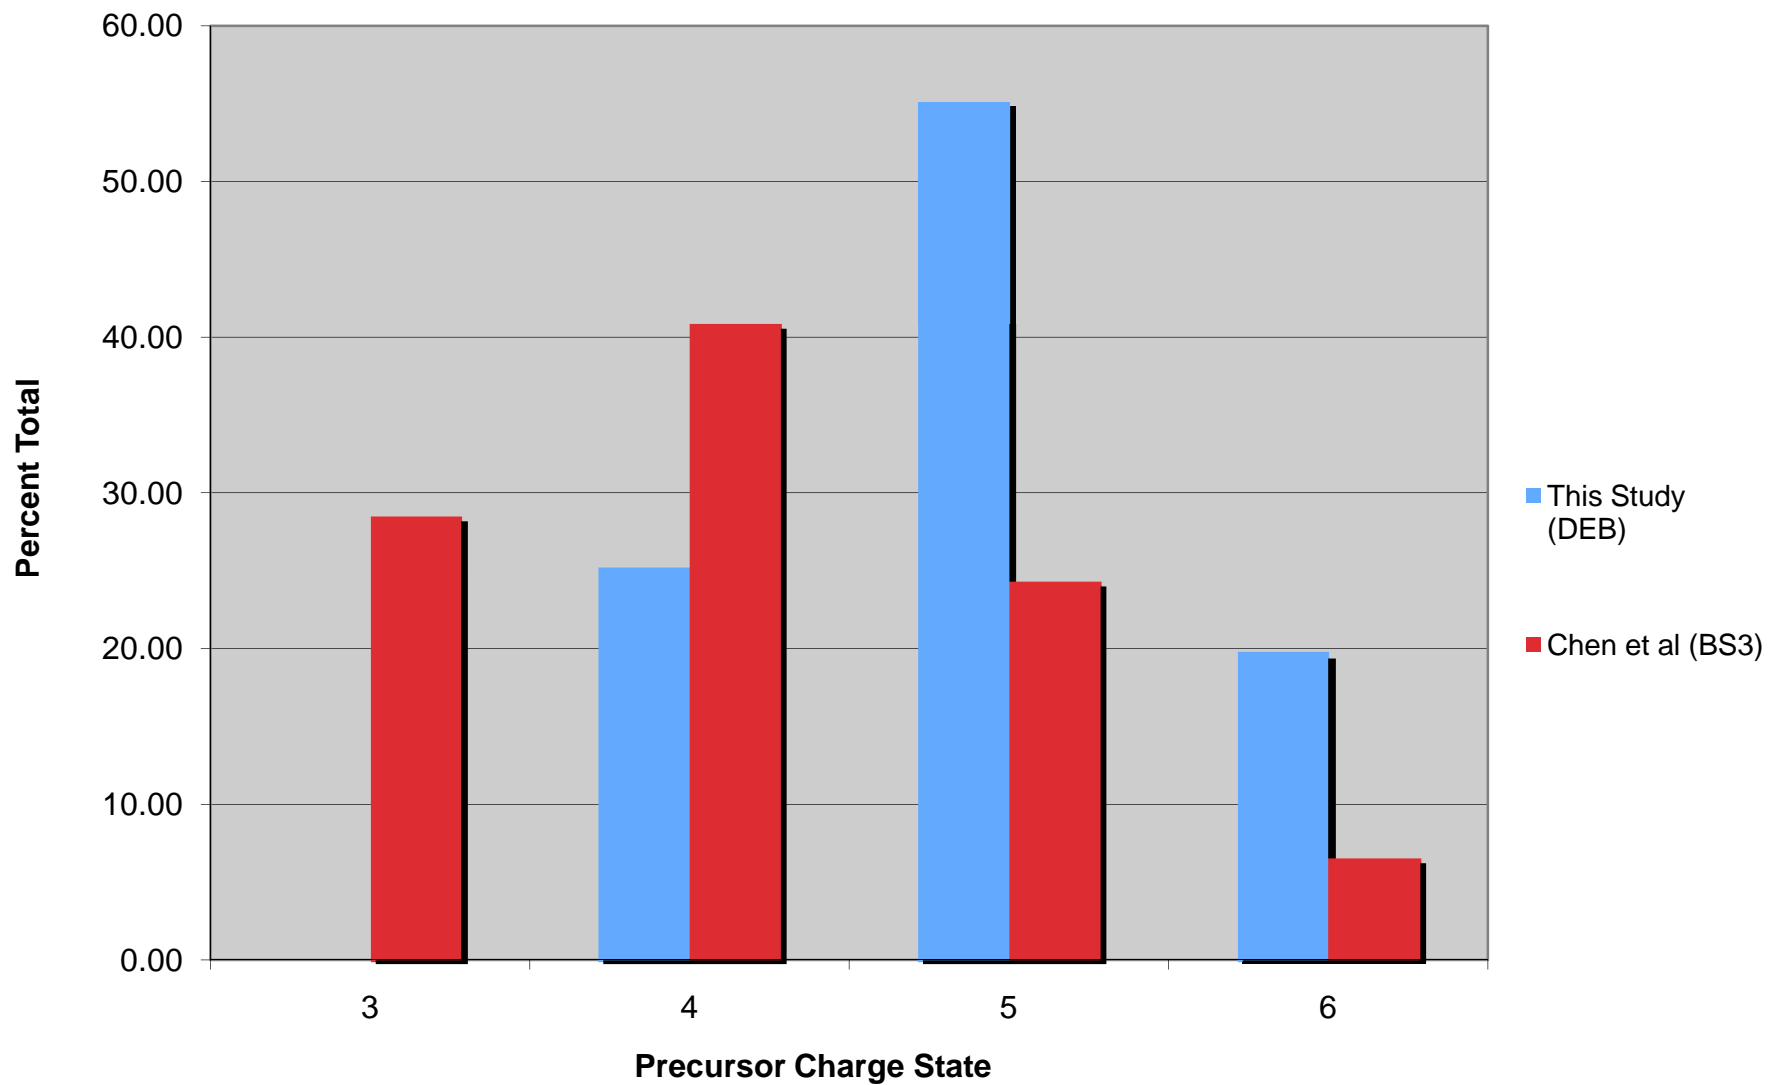

Supplement: supp_M110.003764_mcp.M110.003764-1.pdf [file supp_M110.003764_mcp.M110.003764-1.pdf]
